# Supplementary material
Source: PubMed Central journal article supplement (PMC4240199)
Supplement: supp_ddu364_ddu364supp.pdf [file supp_ddu364_ddu364supp.pdf]

**Supplementary material for “African ancestry is associated with Glaucoma in the Women’s Health Initiative genome-wide association study”**

Thomas J. Hoffmann<sup>1</sup>, Hua Tang<sup>2</sup>, Timothy Thornton<sup>3</sup>, Bette Caan<sup>4</sup>, Amy E. Millen<sup>5</sup>, Fridtjof Thomas<sup>6</sup>, and Neil Risch<sup>1,4</sup>

<sup>1</sup>Department of Epidemiology and Biostatistics, and Institute for Human Genetics, University of California San Francisco, San Francisco, CA, 94143, USA

<sup>2</sup>Department of Genetics, Stanford University School of Medicine, Stanford, CA 94305, USA

<sup>3</sup>Department of Biostatistics, University of Washington, Seattle, WA 98195

<sup>4</sup>Division of Research, Kaiser Permanente, Oakland, CA 94612, USA

<sup>5</sup>Department of Social and Preventative Medicine, University at Buffalo, and The State University of New York, Buffalo, NY 14214, USA

<sup>6</sup>Department of Preventative Medicine, University of Tennessee Health Science Center, Memphis, TN 38105

**Table S1:** Correlation ( $r^2$ ) of markers in the CDKN2B/CDKN2BAS genes in the 1000 Genomes populations ASW/AMR (<http://1000genomes.org>), respectively.

|           | rs7865618 | rs2157719 | rs4977756 | rs1063192 |
|-----------|-----------|-----------|-----------|-----------|
| rs523096  | 0.79/0.88 | 0.79/0.88 | 0.01/0.66 | 0.79/0.86 |
| rs7865618 | —         | 1/1       | 0.03/0.74 | 1/0.95    |
| rs2157719 | —         | —         | 0.03/0.74 | 1/0.95    |
| rs4977756 | —         | —         | —         | 0.03/0.7  |

**Figure S1:** Manhattan and Q-Q plots. In the plot/legend, the color code of the p-values corresponds to the p-value in previously reported studies; for example “typed,  $p < 5 \times 10^{-8}$ ” indicates that a previous study had a p-value  $< 5 \times 10^{-8}$ , i.e., genome-wide significant, and “typed, win  $p < 5 \times 10^{-8}$ ” indicates that it is within 0.5 megabases (1 megabase window) of such a SNP.

(a) African American incident + prevalent (combined via inverse variance method).  $\lambda = 1.022$ . The Manhattan plot is in the main manuscript (Figure 1), the Q-Q plot is shown below.

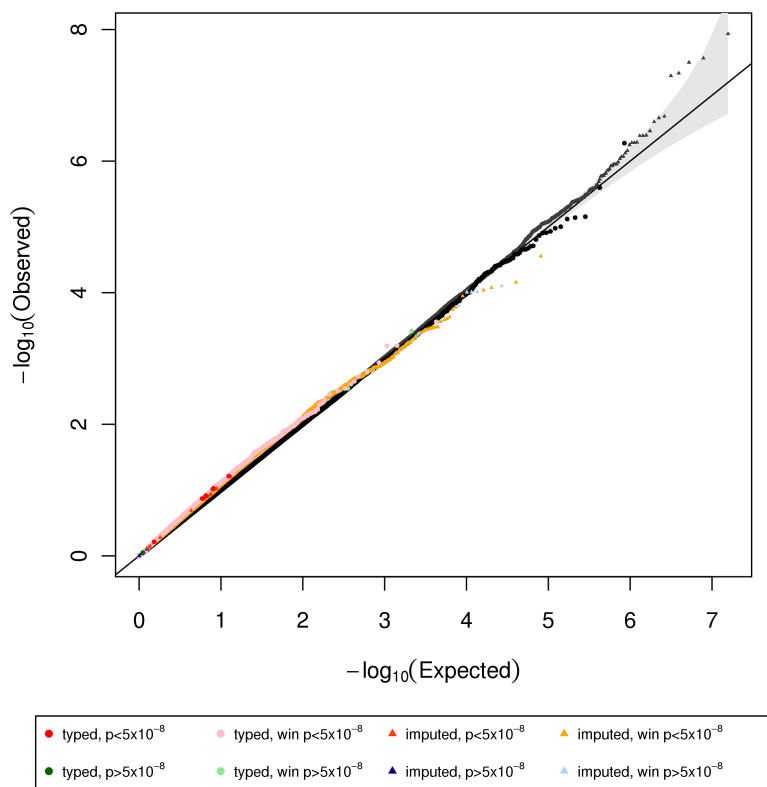

(b) African American incident.  $\lambda = 0.988$ .

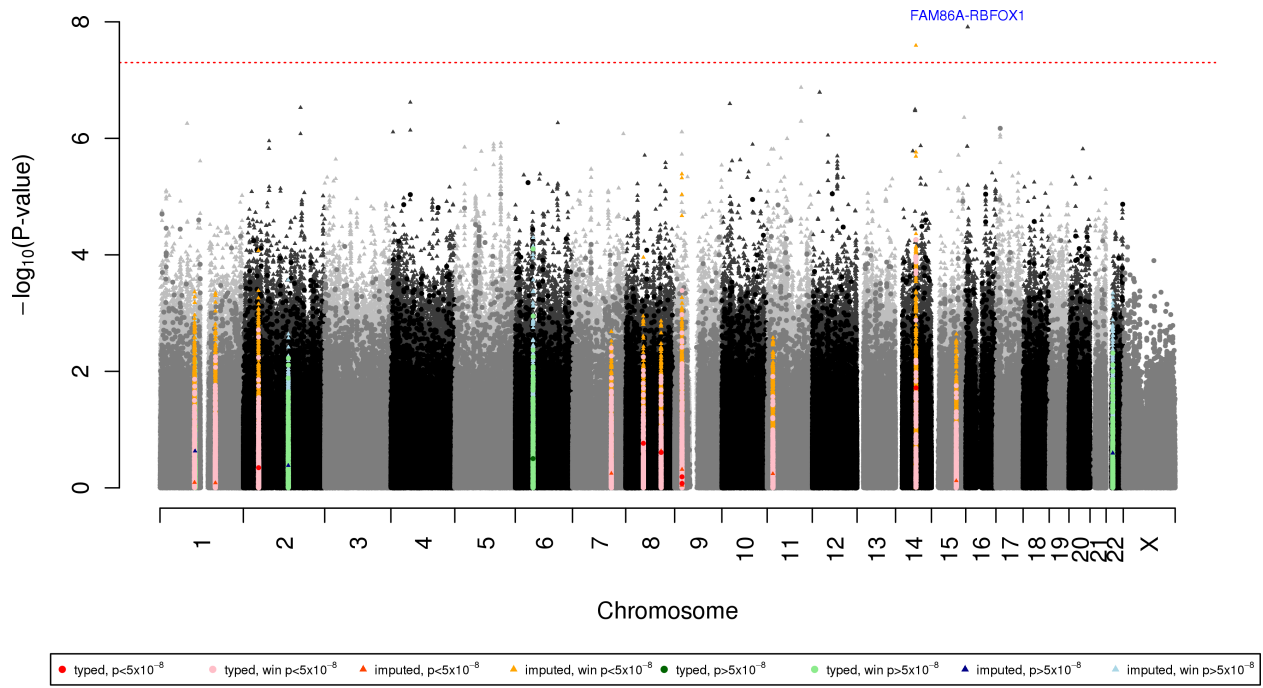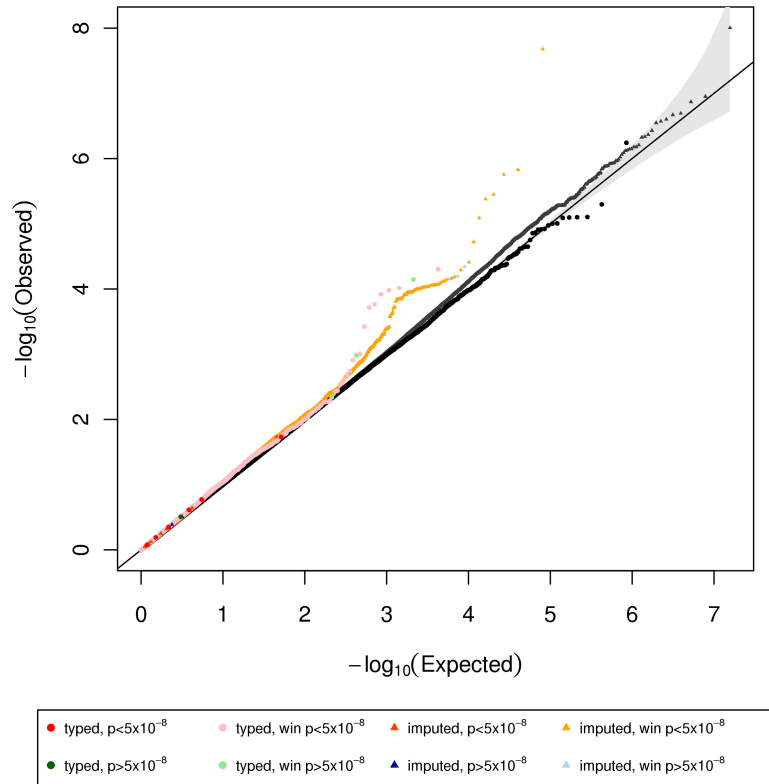

(c) African American prevalent.  $\lambda = 1.014$ .

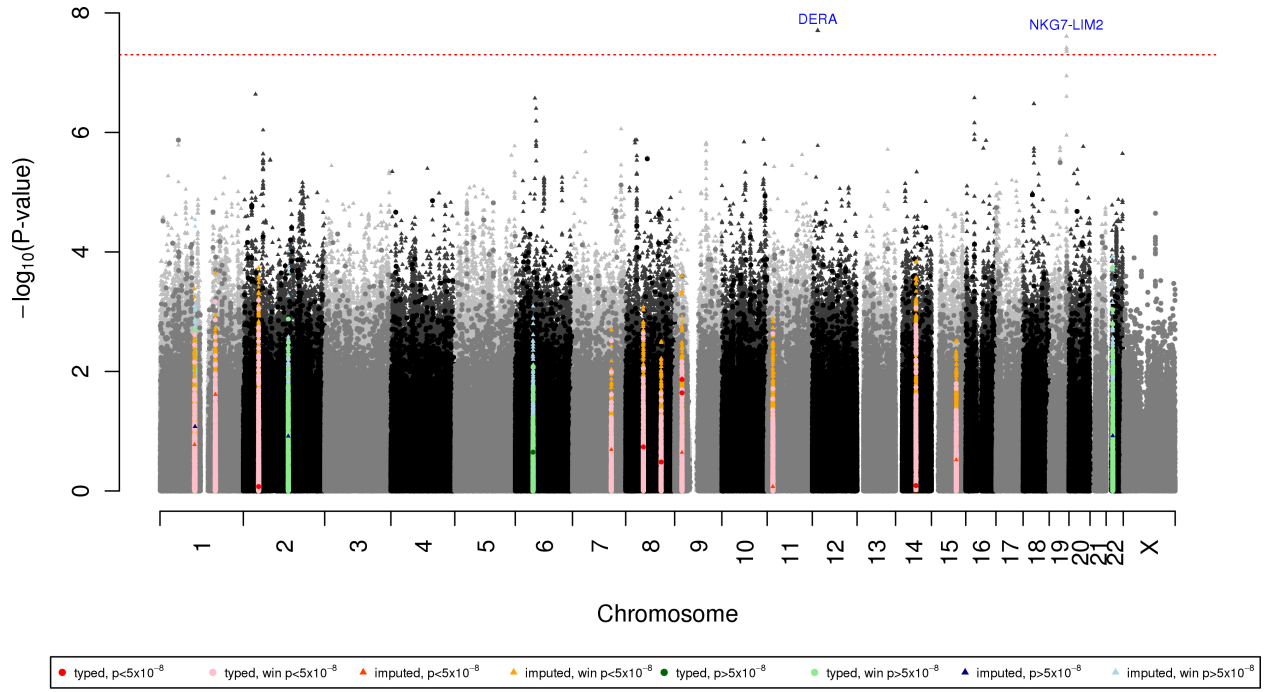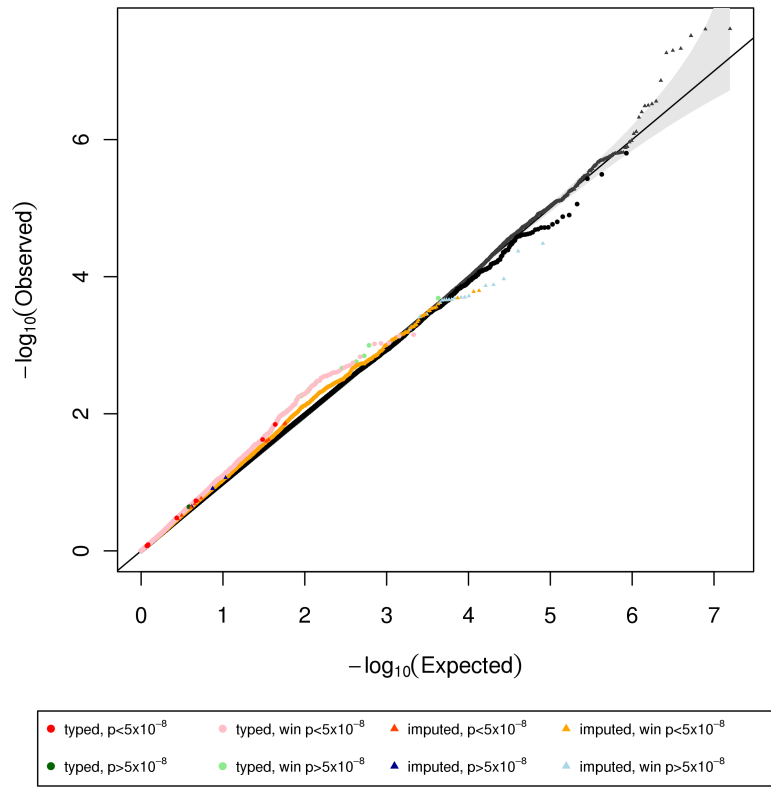



(d) Hispanic incident + prevalent (combined via inverse variance method).  $\lambda = 1.025$ .

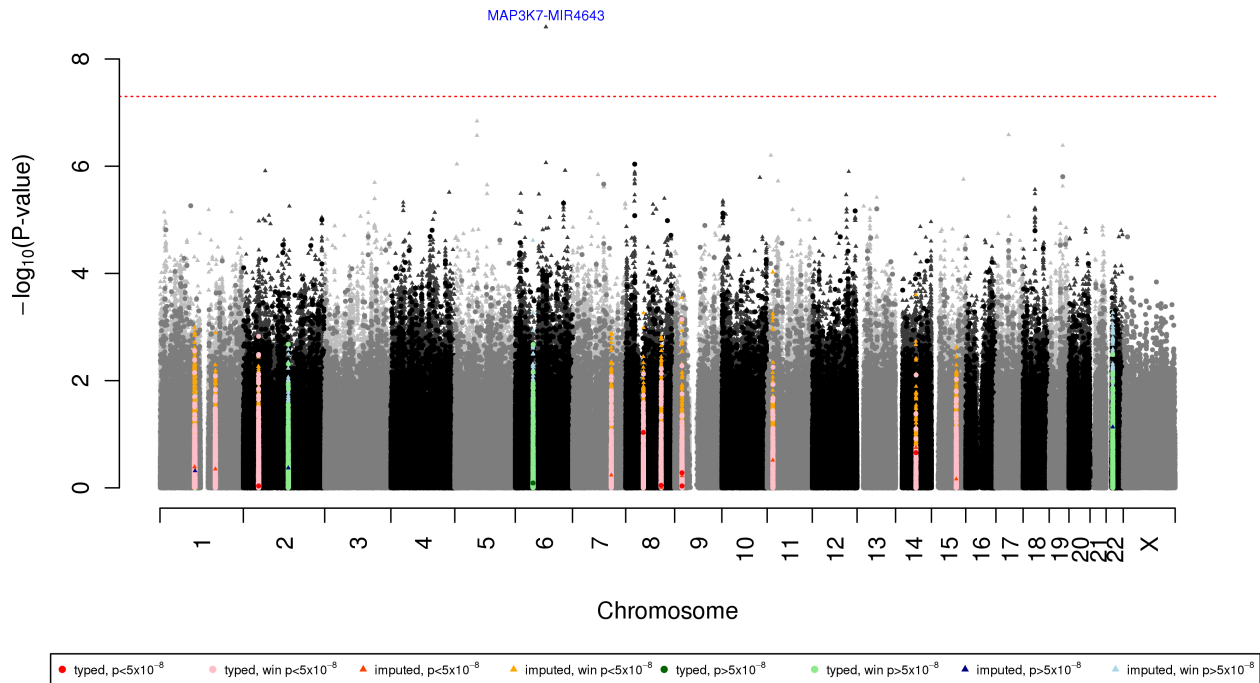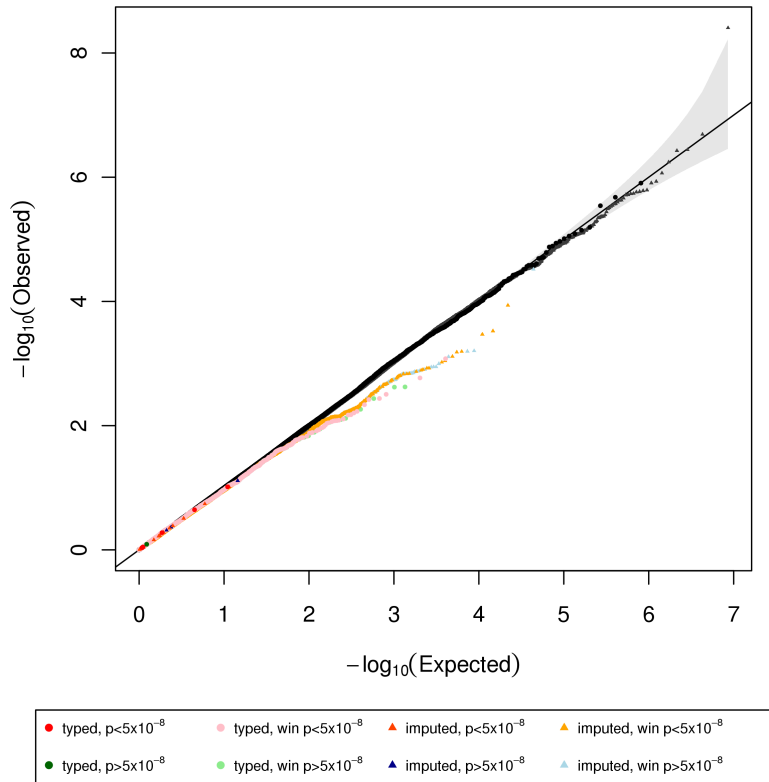

(e) Hispanic incident.  $\lambda = 1.036$ .

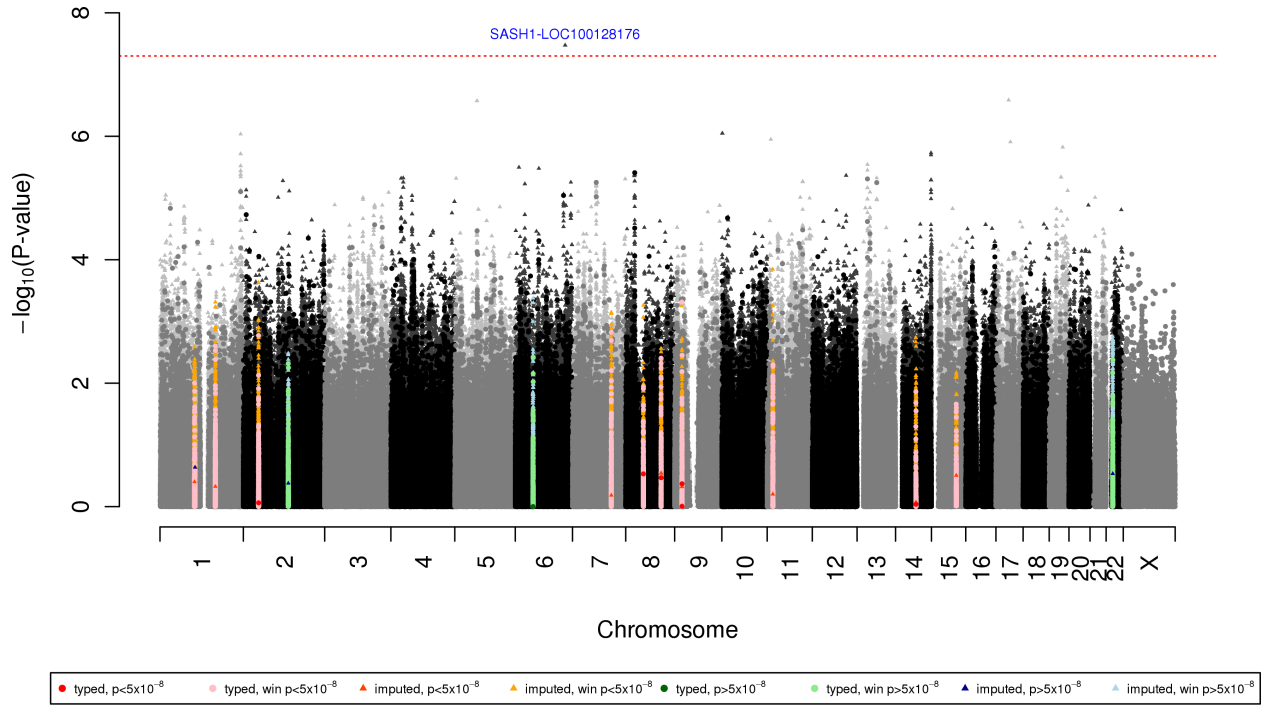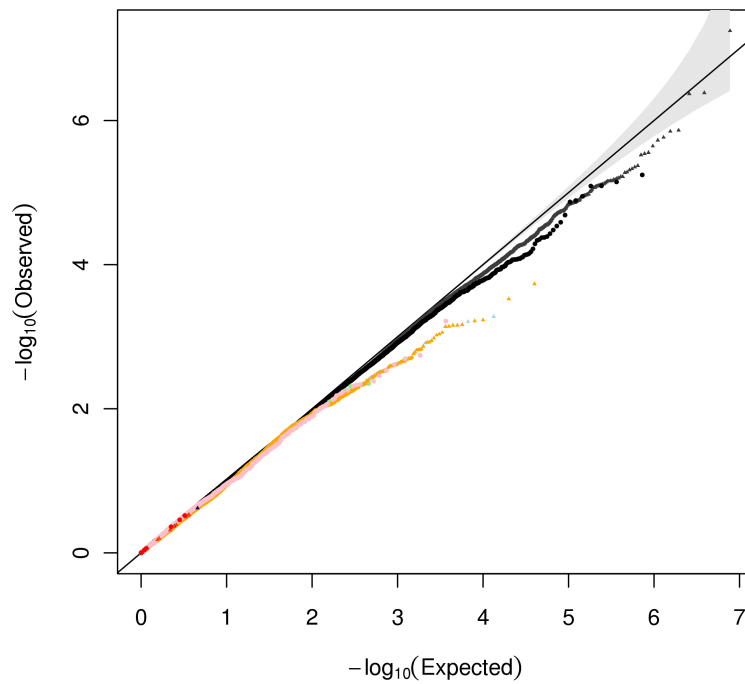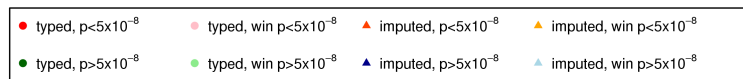

(f) Hispanic prevalent.  $\lambda = 0.994$ .

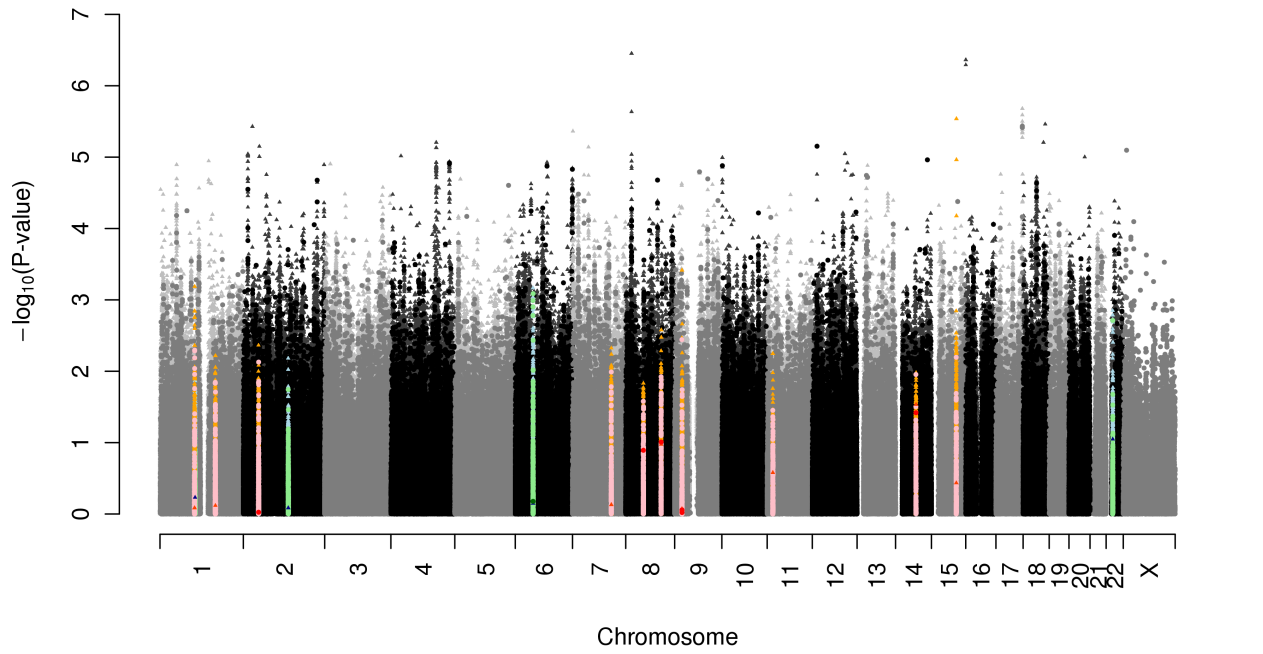

● typed,  $p < 5 \times 10^{-8}$    ● typed, win  $p < 5 \times 10^{-8}$    ▲ imputed,  $p < 5 \times 10^{-8}$    ▲ imputed, win  $p < 5 \times 10^{-8}$    ● typed,  $p > 5 \times 10^{-8}$    ● typed, win  $p > 5 \times 10^{-8}$    ▲ imputed,  $p > 5 \times 10^{-8}$    ▲ imputed, win  $p > 5 \times 10^{-8}$

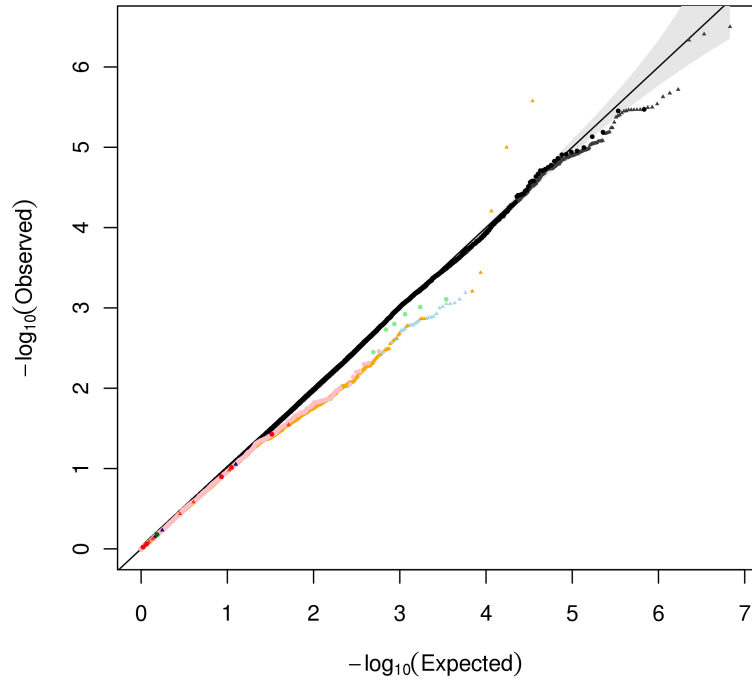

● typed,  $p < 5 \times 10^{-8}$    ● typed, win  $p < 5 \times 10^{-8}$    ▲ imputed,  $p < 5 \times 10^{-8}$    ▲ imputed, win  $p < 5 \times 10^{-8}$   
● typed,  $p > 5 \times 10^{-8}$    ● typed, win  $p > 5 \times 10^{-8}$    ▲ imputed,  $p > 5 \times 10^{-8}$    ▲ imputed, win  $p > 5 \times 10^{-8}$

**Table S2:** P-values of SNPs with  $p < 5 \times 10^{-8}$  in either African American incident, African American prevalent, African American incident, Hispanic incident, or Hispanic prevalent. No hit replicates. Chr, chromosome; AIF, frequency of A1 allele; HR, hazards ratio (incident); OR, odds ratio (prevalent); P, p-value; Prev OR, odds ratio previously reported for SNP; Effect, going across the columns for African American incident, African American prevalent, African American incident, Hispanic incident, and Hispanic prevalent, a “+” indicates the A1 allele was estimated deleterious and a “-” indicates the A2 allele was deleterious.

| SNP                | Chr Pos           | A1        |                    | African American Incident |                | African American Prevalent |                   | African American Comb. |                    |       |                |         |                   |        |                    |         |                |         |         |
|--------------------|-------------------|-----------|--------------------|---------------------------|----------------|----------------------------|-------------------|------------------------|--------------------|-------|----------------|---------|-------------------|--------|--------------------|---------|----------------|---------|---------|
|                    |                   | A1        | A2                 | Case                      | HR/OR          | Case                       | HR/OR             | Case                   | HR/OR              | P     |                |         |                   |        |                    |         |                |         |         |
| rs151326733        | 12                | 16189478  | C                  | G                         | .942           | .027                       | .026              | 1.019                  | .89                | .053  | .026           | 2.2     | 1.9e-08           | 1.48   | 5.7e-05            |         |                |         |         |
|                    |                   |           |                    |                           |                |                            |                   | (.78,1.33)             | (1.67,2.89)        |       |                |         | (1.22,1.8)        | 1.48   | 5.7e-05            |         |                |         |         |
| rs116769055        | 12                | 16191530  | C                  | T                         | .944           | .026                       | .026              | 1.018                  | .9                 | .053  | .026           | 2.2     | 2e-08             | 1.48   | 5.7e-05            |         |                |         |         |
|                    |                   |           |                    |                           |                |                            |                   | (.78,1.33)             | (1.67,2.89)        |       |                |         | (1.22,1.8)        | 1.48   | 5.7e-05            |         |                |         |         |
| chr14:60847430:I14 | 14                | 60847430  | AAAGG              | A                         | .859           | .45                        | .392              | 1.3                    | 2.5e-08            | .388  | .401           | .95     | .42               | 1.17   | 5.8e-05            |         |                |         |         |
|                    |                   |           |                    |                           |                |                            |                   | (1.19,1.43)            | (.84,1.078)        |       |                |         | (1.083,1.26)      | 1.17   | 5.8e-05            |         |                |         |         |
| rs3116139          | 19                | 51879034  | T                  | C                         | .986           | .936                       | .934              | 1.022                  | .81                | .894  | .934           | .57     | 2.5e-08           | .79    | .00037             |         |                |         |         |
|                    |                   |           |                    |                           |                |                            |                   | (.86,1.22)             | (.47,.7)           |       |                |         | (.69,.9)          | .79    | .00037             |         |                |         |         |
| rs2547318          | 19                | 51883727  | A                  | G                         | .973           | .934                       | .932              | 1.012                  | .9                 | .892  | .932           | .58     | 4.1e-08           | .79    | .00036             |         |                |         |         |
|                    |                   |           |                    |                           |                |                            |                   | (.85,1.2)              | (.48,.7)           |       |                |         | (.69,.9)          | .79    | .00036             |         |                |         |         |
| rs2547316          | 19                | 51884597  | G                  | A                         | .968           | .934                       | .931              | 1.012                  | .9                 | .892  | .932           | .58     | 3.8e-08           | .79    | .00035             |         |                |         |         |
|                    |                   |           |                    |                           |                |                            |                   | (.85,1.2)              | (.48,.7)           |       |                |         | (.69,.9)          | .79    | .00035             |         |                |         |         |
| rs1978456          | 19                | 51886715  | G                  | T                         | .963           | .933                       | .931              | 1.01                   | .91                | .892  | .932           | .58     | 4.4e-08           | .79    | .00036             |         |                |         |         |
|                    |                   |           |                    |                           |                |                            |                   | (.85,1.2)              | (.48,.71)          |       |                |         | (.69,.9)          | .79    | .00036             |         |                |         |         |
| rs190298731        | 6                 | 149059291 | T                  | A                         | .631           | .158                       | .16               | .98                    | .83                | .164  | .159           | 1.053   | .6                | 1.0087 | .88                |         |                |         |         |
|                    |                   |           |                    |                           |                |                            |                   | (.85,1.14)             | (.87,1.28)         |       |                |         | (.9,1.13)         | 1.0087 | .88                |         |                |         |         |
| SNP                | Hispanic Incident |           | Hispanic Prevalent |                           | Hispanic Comb. |                            | Hispanic Incident |                        | Hispanic Prevalent |       | Hispanic Comb. |         | Hispanic Incident |        | Hispanic Prevalent |         | Hispanic Comb. |         |         |
|                    | r <sup>2</sup>    | Case      | HR/OR              | Case                      | HR/OR          | Case                       | HR/OR             | Case                   | HR/OR              | Case  | HR/OR          | Case    | HR/OR             | Case   | HR/OR              | Case    | HR/OR          | Case    | HR/OR   |
| rs151326733        | .896              | .002      | .002               | 0                         | .002           | —                          | —                 | —                      | —                  | —     | —              | —       | —                 | —      | —                  | —       | —              | —       | —       |
|                    |                   |           |                    |                           |                |                            |                   |                        |                    |       |                |         |                   |        |                    |         |                |         |         |
| rs116769055        | .899              | .002      | .002               | 0                         | .002           | —                          | —                 | —                      | —                  | —     | —              | —       | —                 | —      | —                  | —       | —              | —       | —       |
|                    |                   |           |                    |                           |                |                            |                   |                        |                    |       |                |         |                   |        |                    |         |                |         |         |
| chr14:60847430:I14 | .87               | .254      | .244               | 1.094                     | .35            | .265                       | .245              | 1.15                   | .34                | 1.11  | .19            | .19     | .19               | 1.11   | .19                | .19     | .19            | .19     | .19     |
|                    |                   |           |                    |                           |                |                            |                   |                        |                    |       |                |         |                   |        |                    |         |                |         |         |
| rs3116139          | .987              | .74       | .73                | 1.041                     | .65            | .739                       | .731              | .995                   | .97                | 1.027 | .72            | .72     | .72               | 1.027  | .72                | .72     | .72            | .72     | .72     |
|                    |                   |           |                    |                           |                |                            |                   |                        |                    |       |                |         |                   |        |                    |         |                |         |         |
| rs2547318          | .991              | .739      | .729               | 1.034                     | .7             | .739                       | .73               | 1.0036                 | .98                | 1.025 | .74            | .74     | .74               | 1.025  | .74                | .74     | .74            | .74     | .74     |
|                    |                   |           |                    |                           |                |                            |                   |                        |                    |       |                |         |                   |        |                    |         |                |         |         |
| rs2547316          | .985              | .739      | .727               | 1.04                      | .66            | .738                       | .729              | 1.0042                 | .98                | 1.029 | .7             | .7      | .7                | 1.029  | .7                 | .7      | .7             | .7      | .7      |
|                    |                   |           |                    |                           |                |                            |                   |                        |                    |       |                |         |                   |        |                    |         |                |         |         |
| rs1978456          | .983              | .739      | .727               | 1.042                     | .64            | .739                       | .729              | 1.013                  | .92                | 1.033 | .66            | .66     | .66               | 1.033  | .66                | .66     | .66            | .66     | .66     |
|                    |                   |           |                    |                           |                |                            |                   |                        |                    |       |                |         |                   |        |                    |         |                |         |         |
| rs190298731        | .526              | .128      | .082               | 2.3                       | 3.3e-08        | .085                       | .087              | .96                    | .9                 | 1.92  | 1.2e-06        | 1.2e-06 | 1.2e-06           | 1.92   | 1.2e-06            | 1.2e-06 | 1.2e-06        | 1.2e-06 | 1.2e-06 |
|                    |                   |           |                    |                           |                |                            |                   |                        |                    |       |                |         |                   |        |                    |         |                |         |         |
|                    |                   |           |                    |                           |                |                            |                   |                        |                    |       |                |         |                   |        |                    |         |                |         |         |

**Figure S2:** Local LD plots for SNPs identified as associated with Glaucoma in previous GWAS, and what population the SNP was originally found in. The LD reported is that in the population it was originally found in. AA, African American; Hisp, Hispanic; P, prevalent; I, incident; EUR, European race/ethnicity 1000 Genomes individuals; ASN, Asian race/ethnicity 1000 Genomes individuals.

(a) rs3753841 (Originally found in Asian race/ethnicity, replicated in both Asian and White race/ethnicity [8])

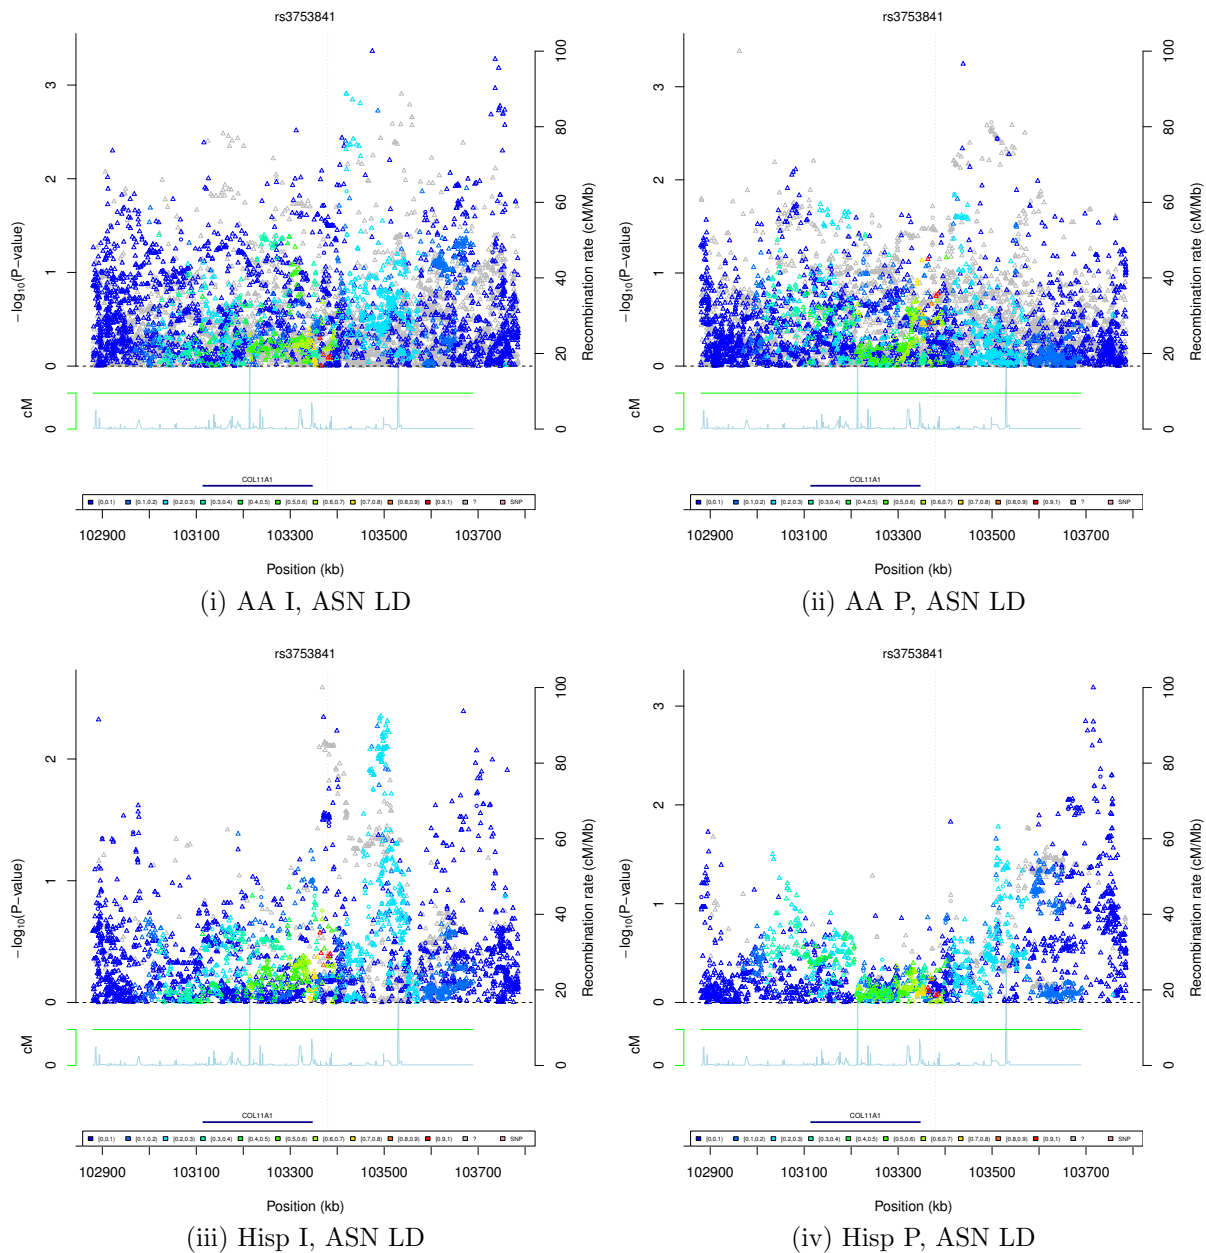

(b) rs10881542 (Originally found in Asian race/ethnicity, replicated in both Asian and White race/ethnicity [8])

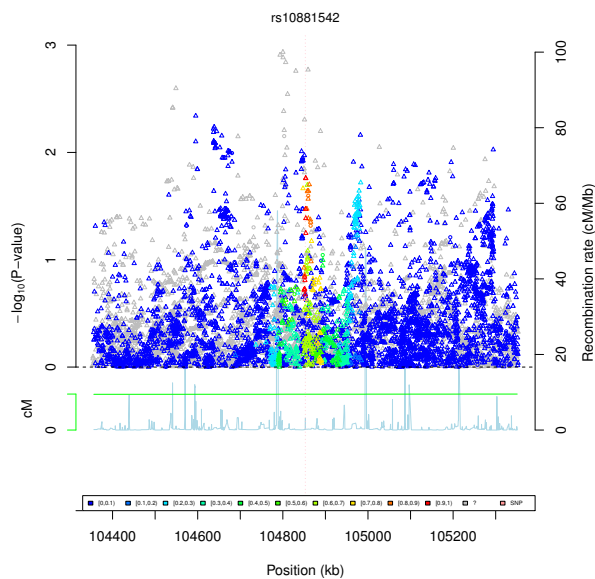

(i) AA I, ASN LD

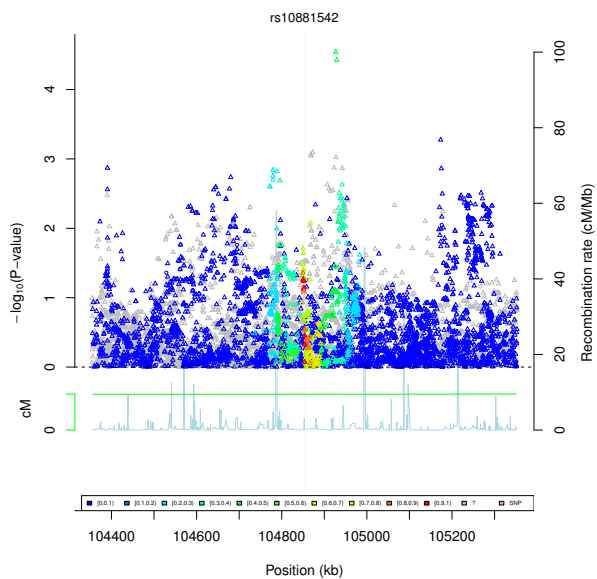

(ii) AA P, ASN LD

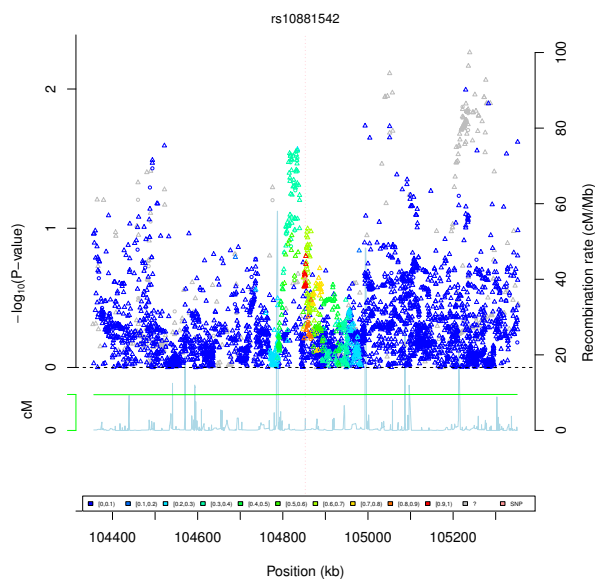

(iii) Hisp I, ASN LD

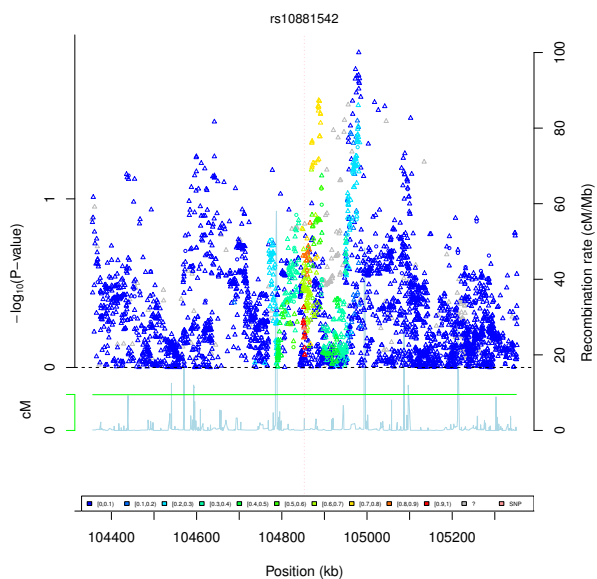

(iv) Hisp P, ASN LD

(c) rs4656461 (European, European replication [1])

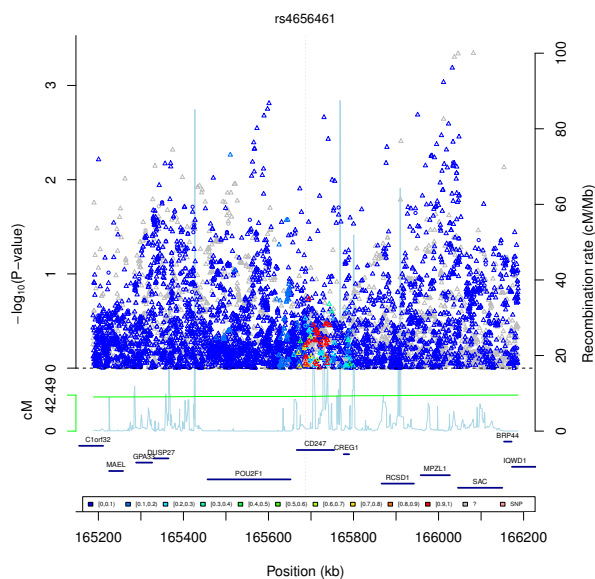

(i) AA I, EUR LD

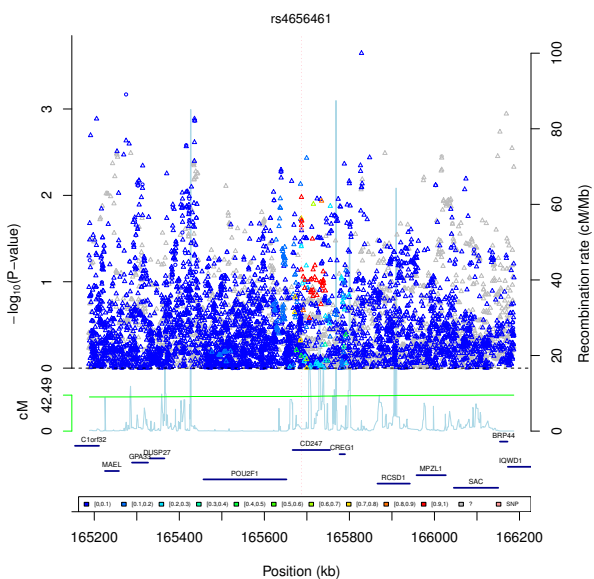

(ii) AA P, EUR LD

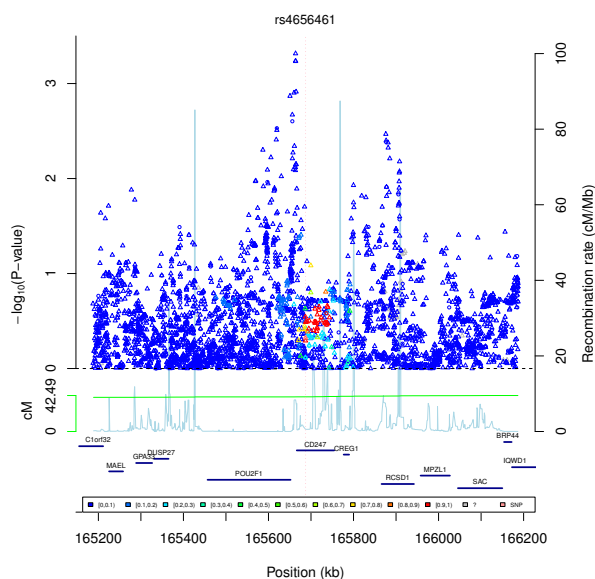

(iii) Hisp I, EUR LD

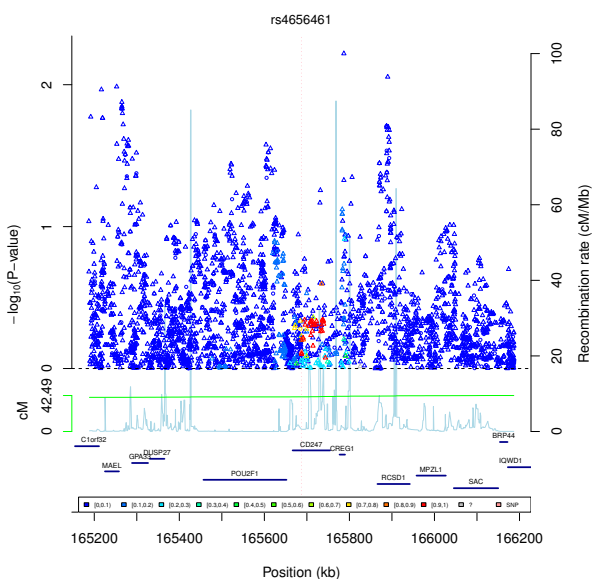

(iv) Hisp P, EUR LD

(d) rs7588567 (Japanese, Japanese replication [4])

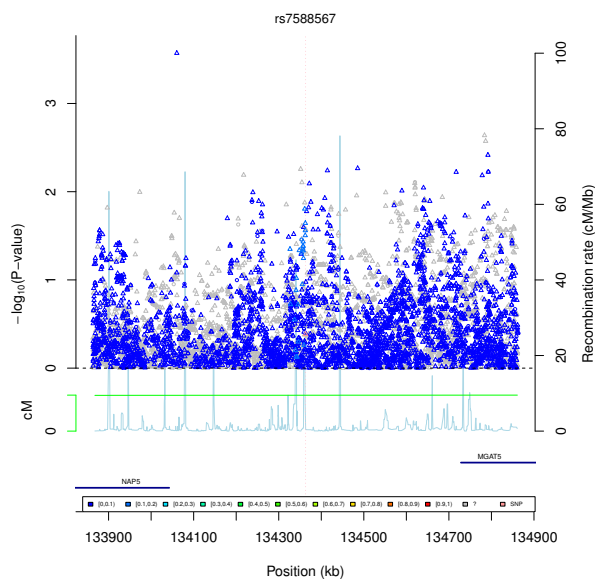

(i) AA I, ASN LD

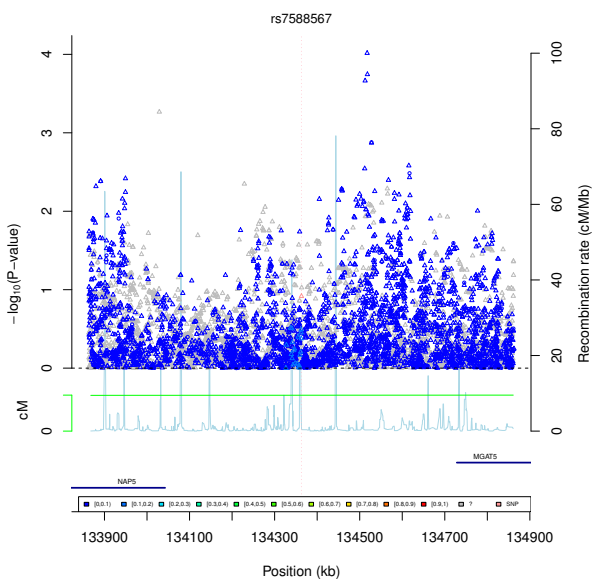

(ii) AA P, ASN LD

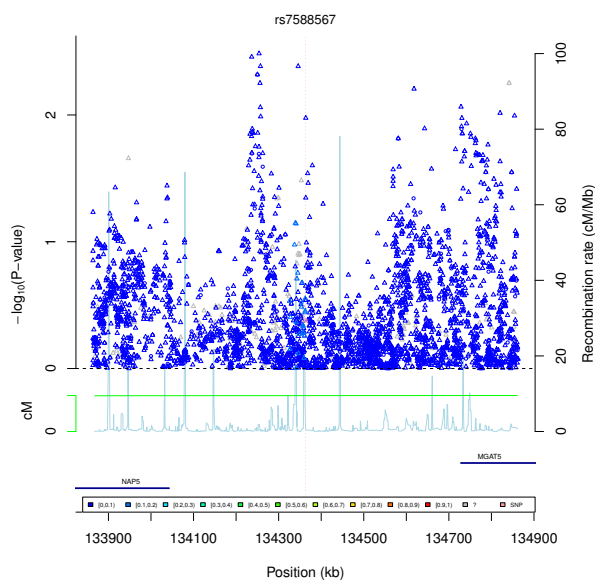

(iii) Hisp I, ASN LD

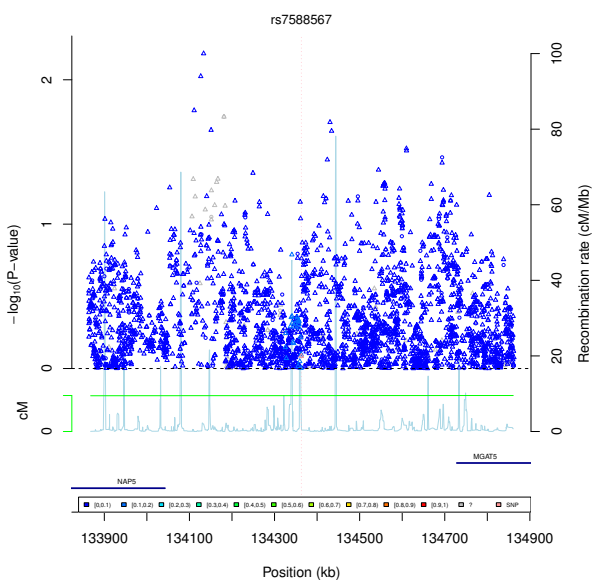

(iv) Hisp P, ASN LD



(e) rs4236601 (Icelandic, European replication [7])

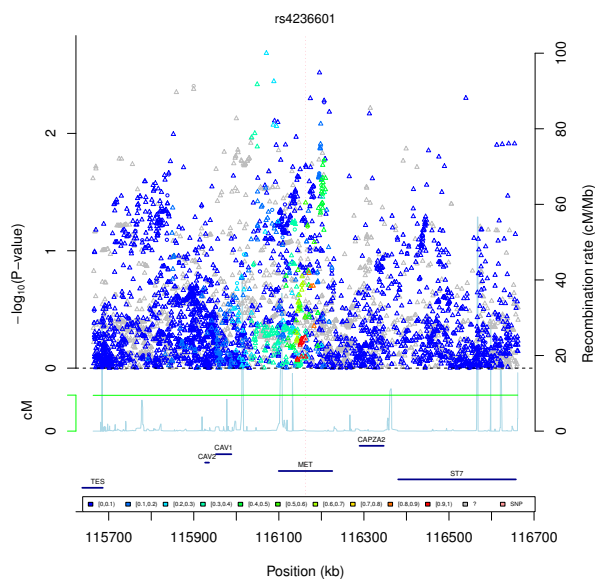

(i) AA I, EUR LD

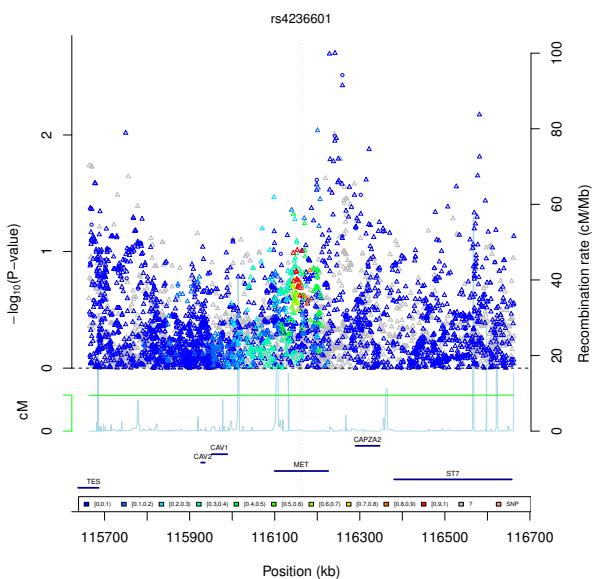

(ii) AA P, EUR LD

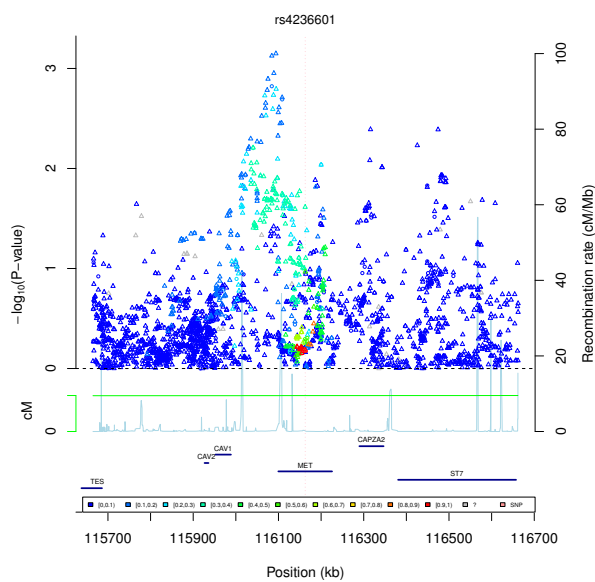

(iii) Hisp I, EUR LD

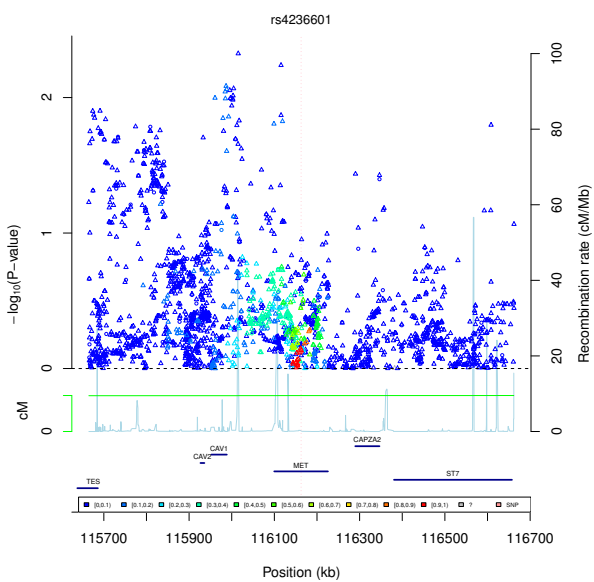

(iv) Hisp P, EUR LD

(f) rs1015213 (Originally found in Asian race/ethnicity, replicated in both Asian and White race/ethnicity [8])

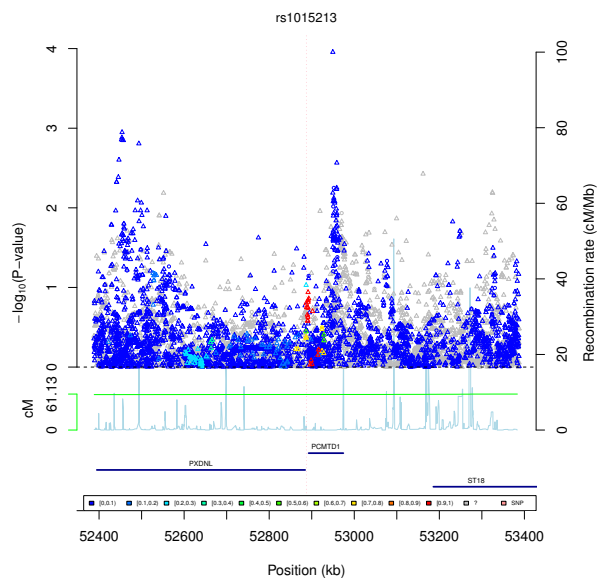

(i) AA I, ASN LD

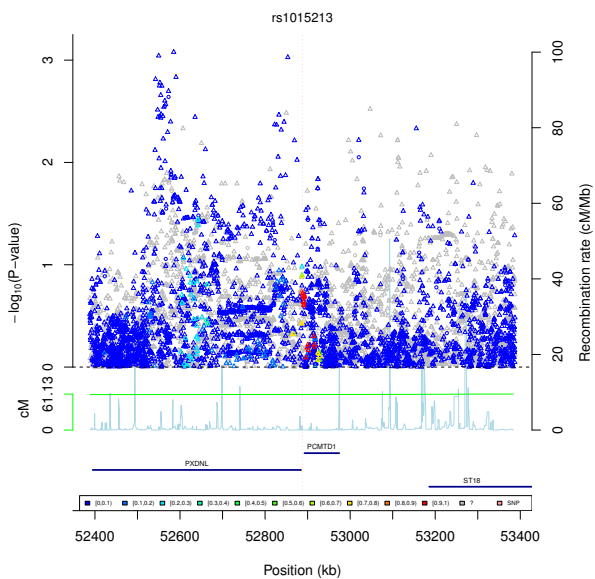

(ii) AA P, ASN LD

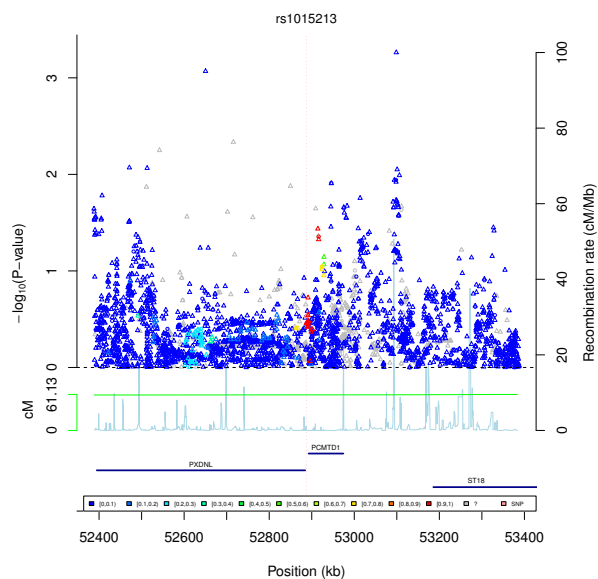

(iii) Hisp I, ASN LD

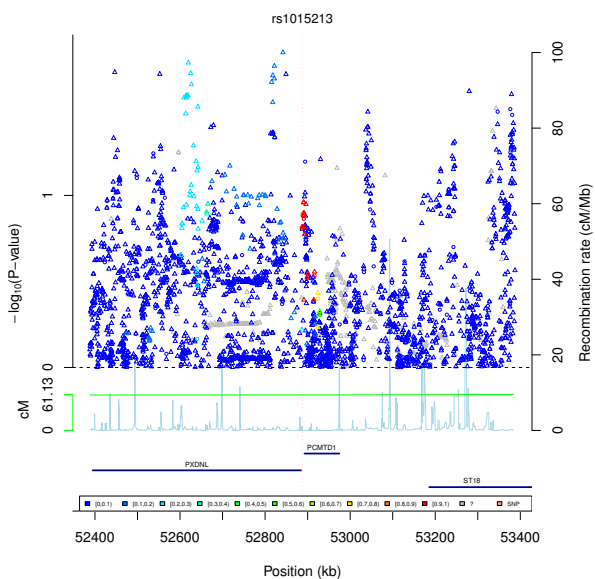

(iv) Hisp P, ASN LD

(g) rs1063192 (Japanese, Japanese replication [4])

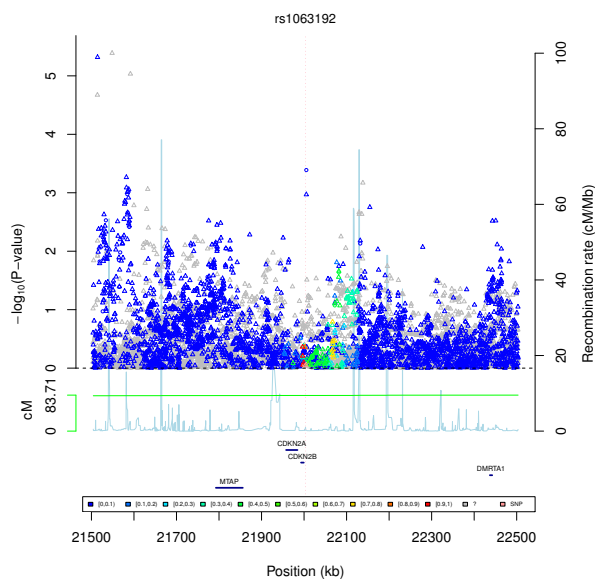

(i) AA I, ASN LD

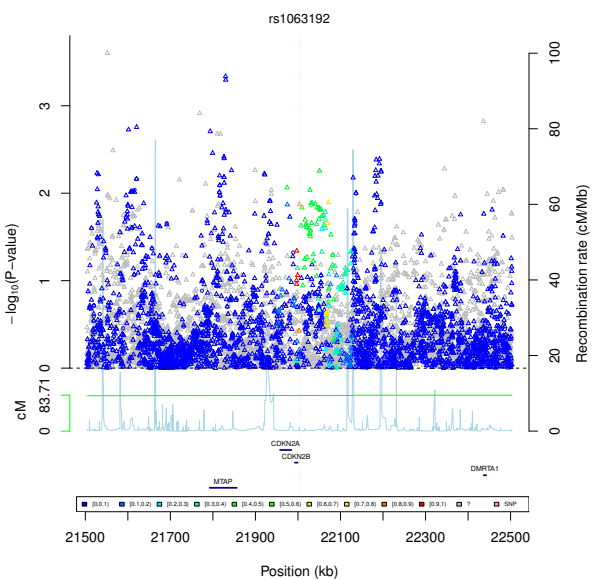

(ii) AA P, ASN LD

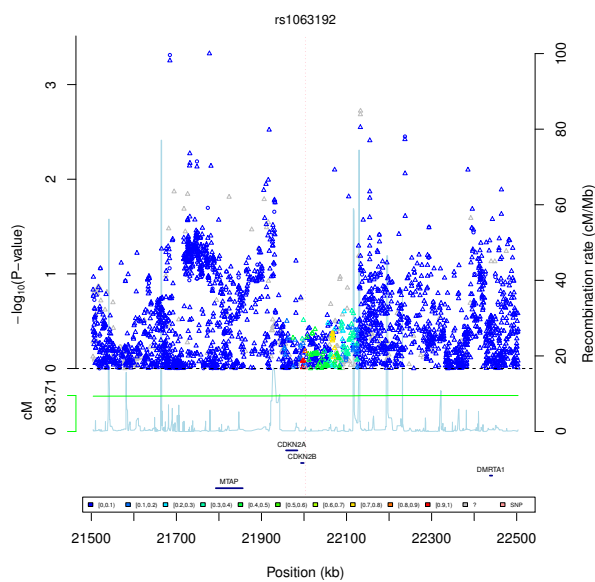

(iii) Hisp I, ASN LD

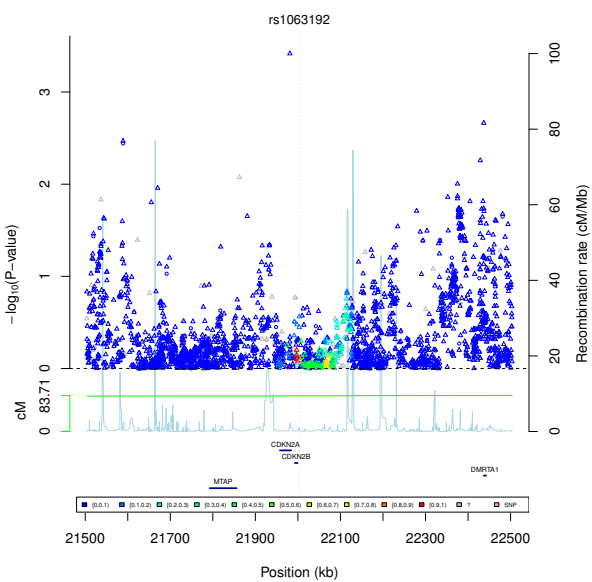

(iv) Hisp P, ASN LD

(h) rs523096 (Japanese, Japanese replication [5])

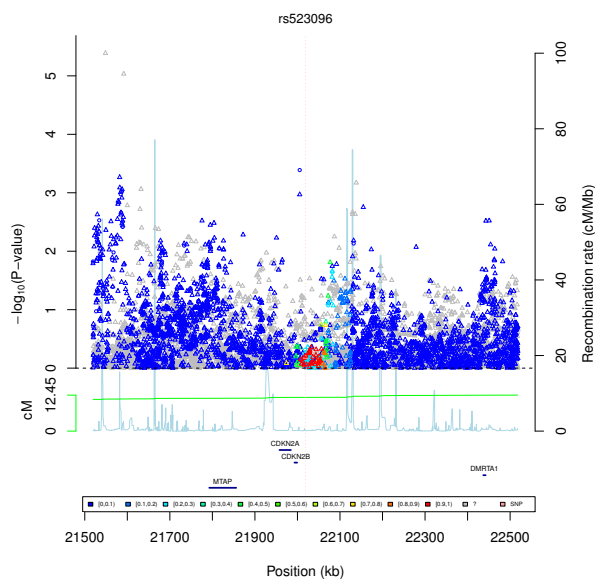

(i) AA I, ASN LD

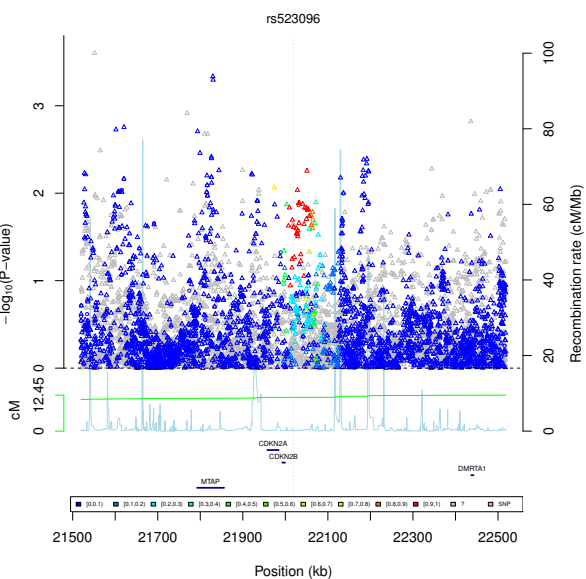

(ii) AA P, ASN LD

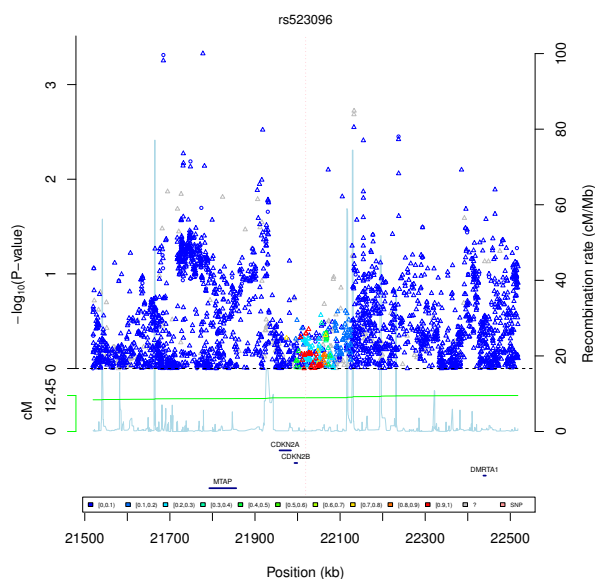

(iii) Hisp I, ASN LD

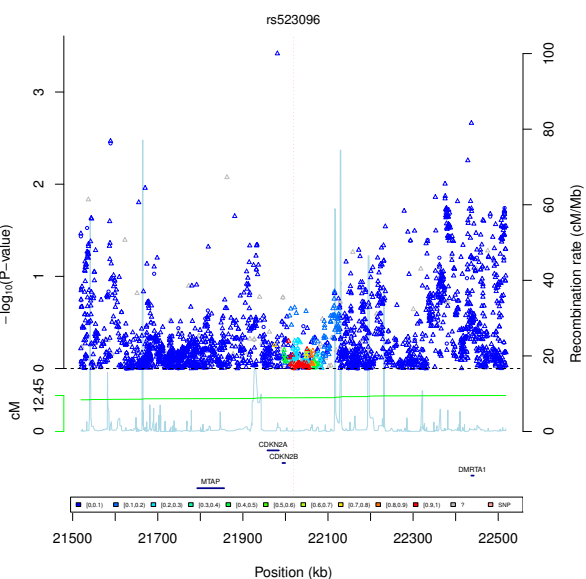

(iv) Hisp P, ASN LD

(i) rs7865618 (Japanese, Japanese replication [3])

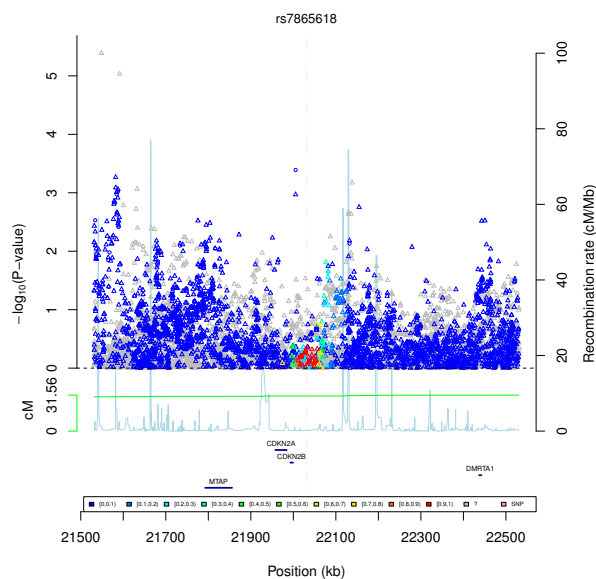

(i) AA I, ASN LD

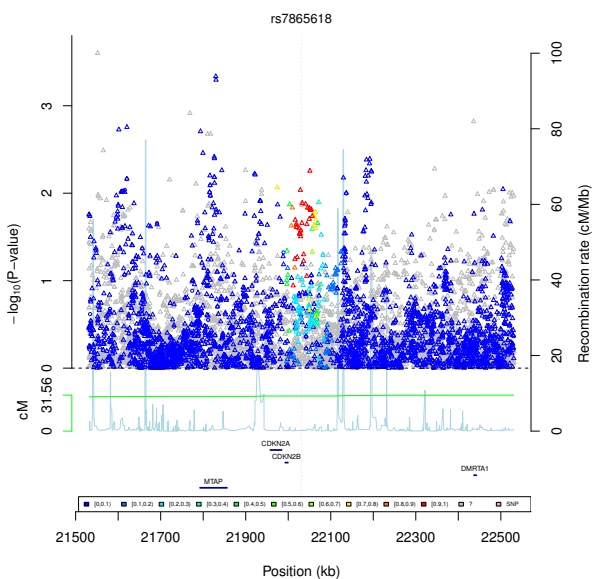

(ii) AA P, ASN LD

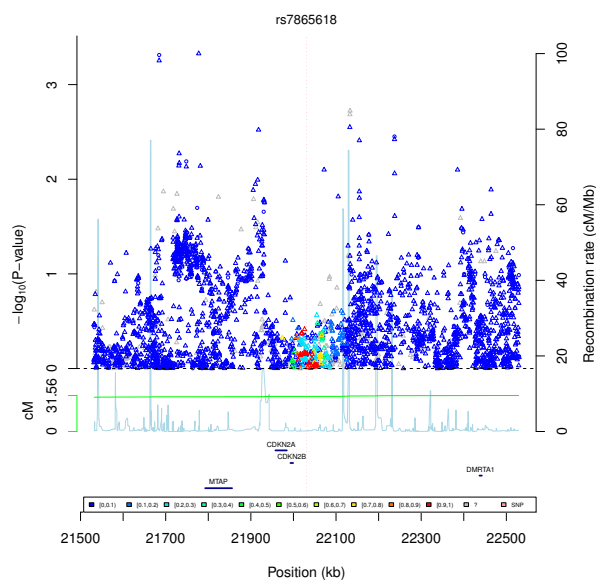

(iii) Hisp I, ASN LD

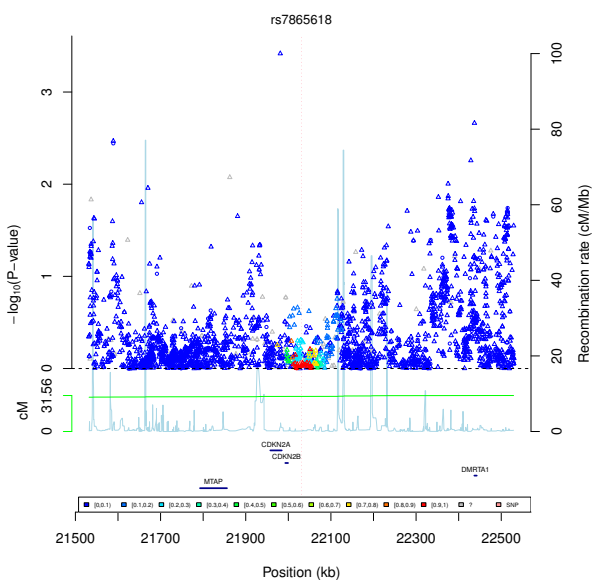

(iv) Hisp P, ASN LD

(j) rs4977756 (European, European replication [1])

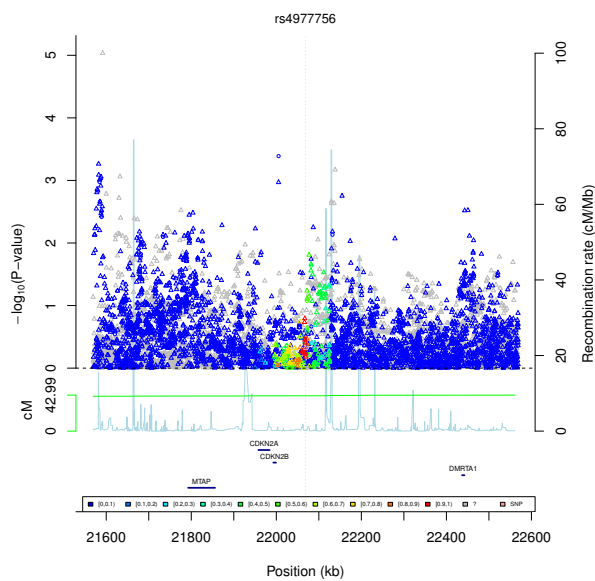

(i) AA I, EUR LD

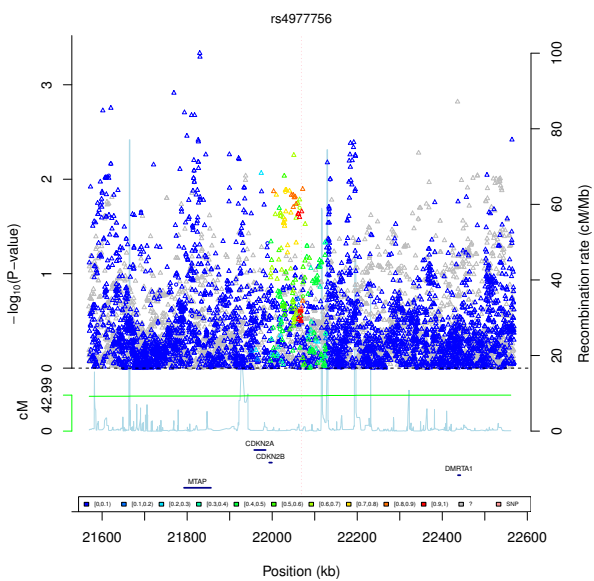

(ii) AA P, EUR LD

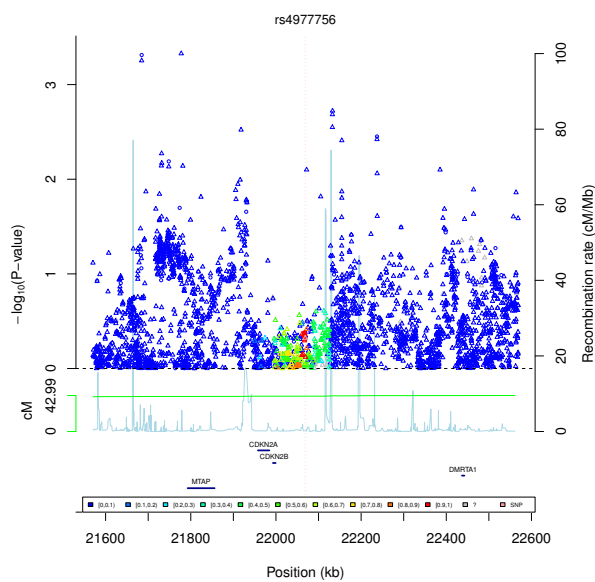

(iii) Hisp I, EUR LD

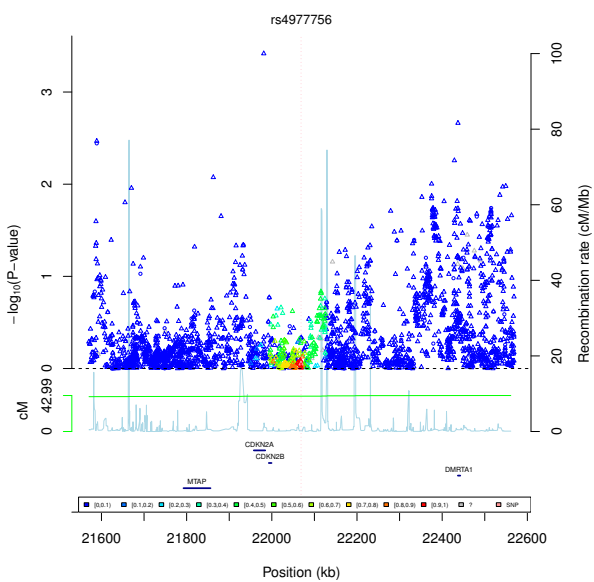

(iv) Hisp P, EUR LD

(k) rs11024102, (Originally found in Asian race/ethnicity, replicated in both Asian and White race/ethnicity [8])

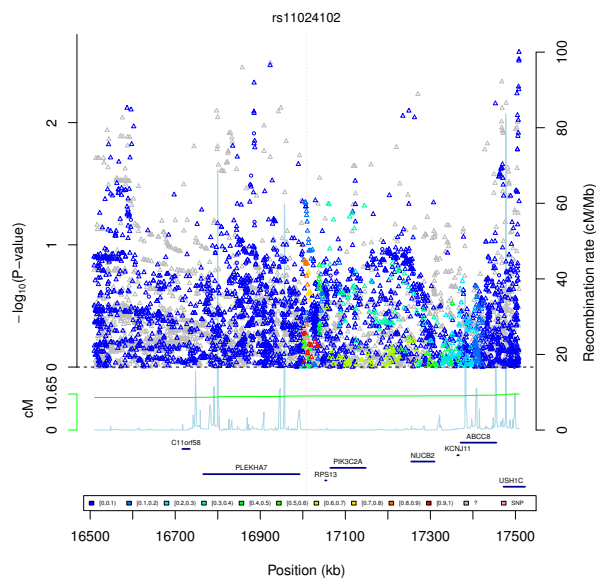

(i) AA I, ASN LD

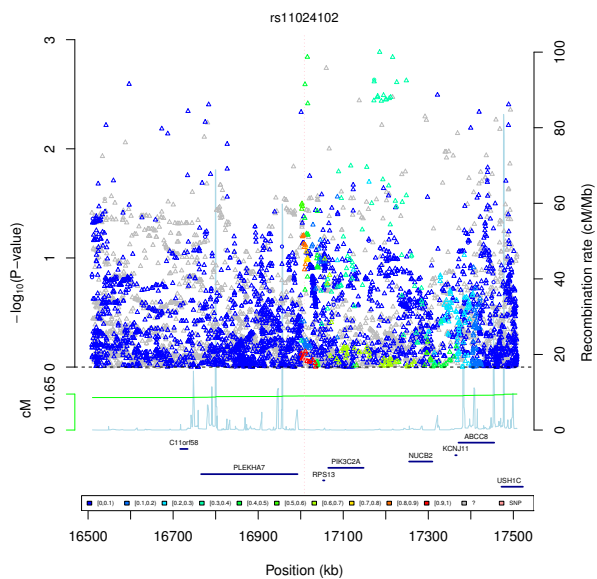

(ii) AA P, ASN LD

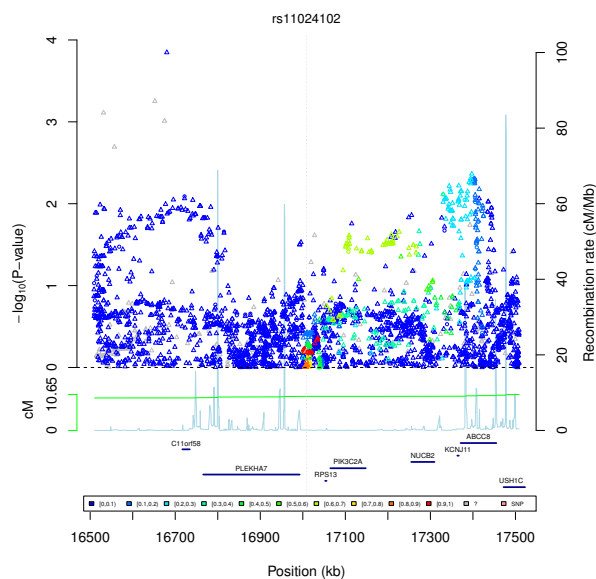

(iii) Hisp I, ASN LD

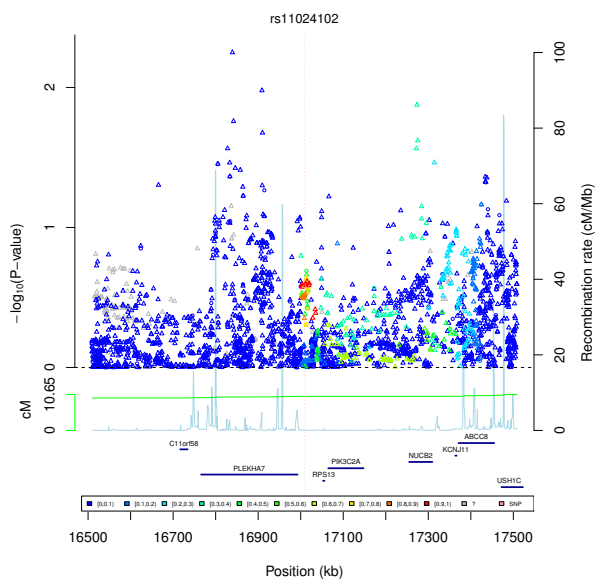

(iv) Hisp P, ASN LD

(1) rs10483727 (Meta-analysis of White ancestry [9]; Japanese, Japanese replication [4])

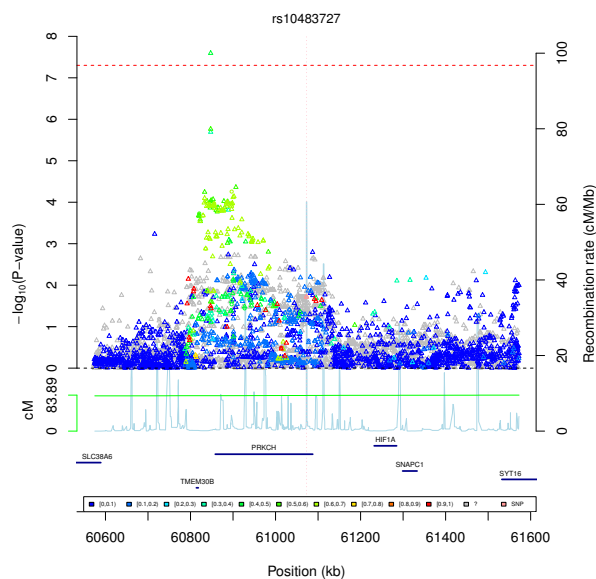

(i) AA I, EUR LD

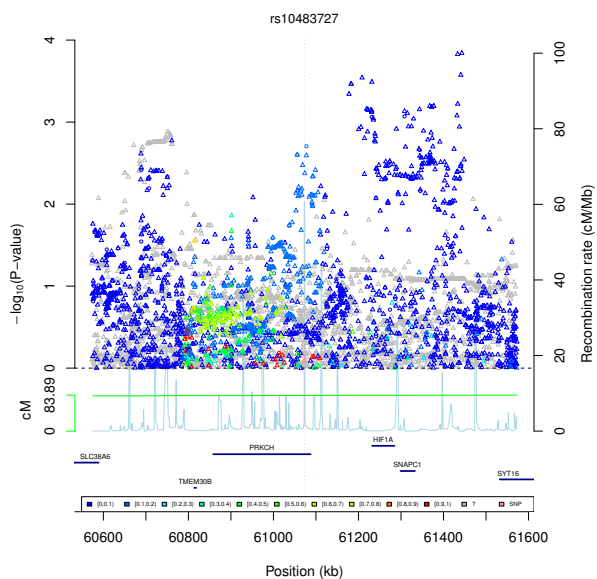

(ii) AA P, EUR LD

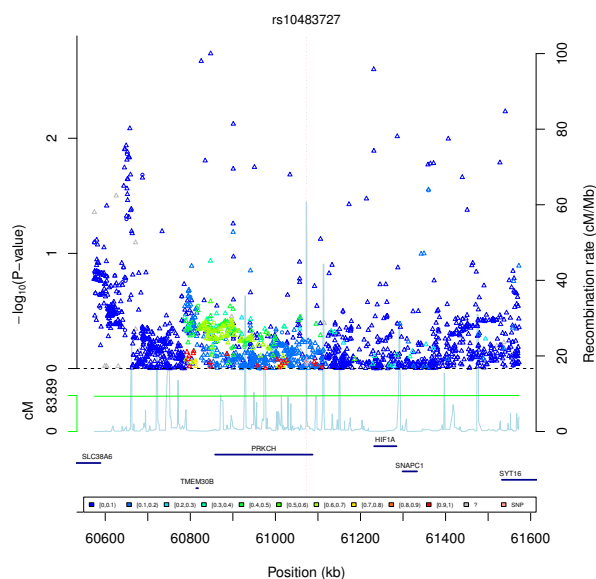

(iii) Hisp I, EUR LD

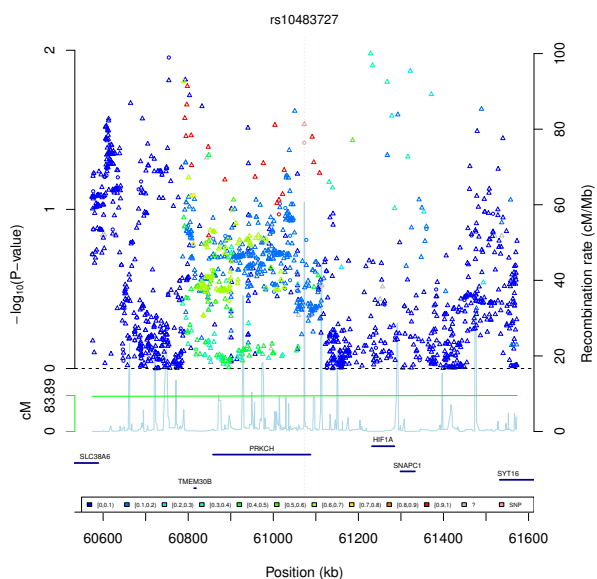

(iv) Hisp P, EUR LD



(m) rs3788317 (Originally found in Asian race/ethnicity, replicated in both Asian and White race/ethnicity [8])

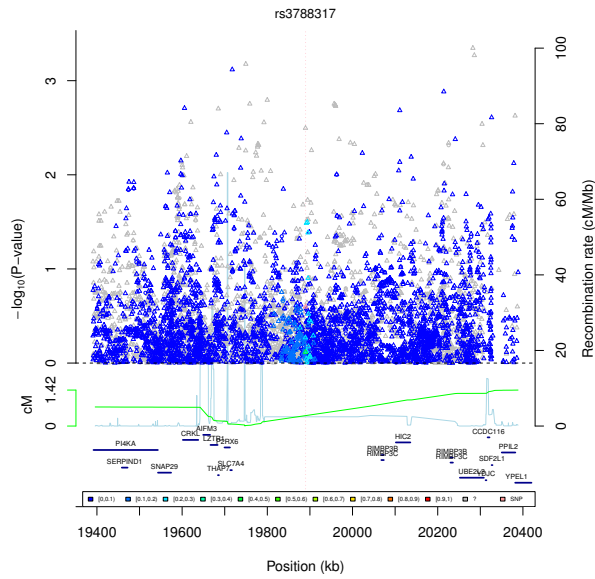

(i) AA I, ASN LD

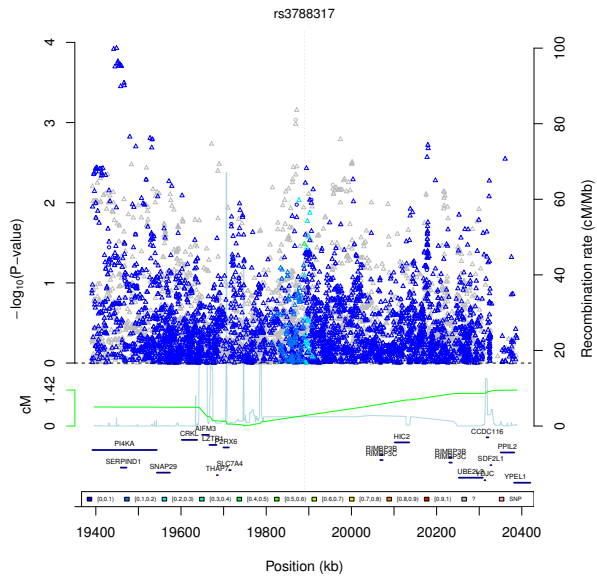

(ii) AA P, ASN LD

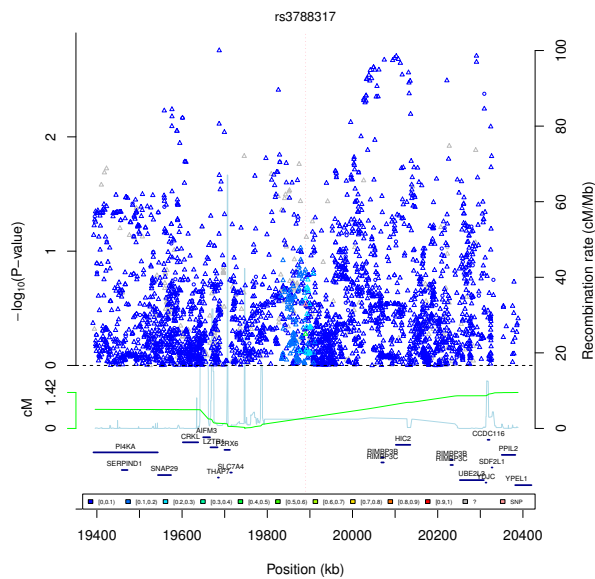

(iii) Hisp I, ASN LD

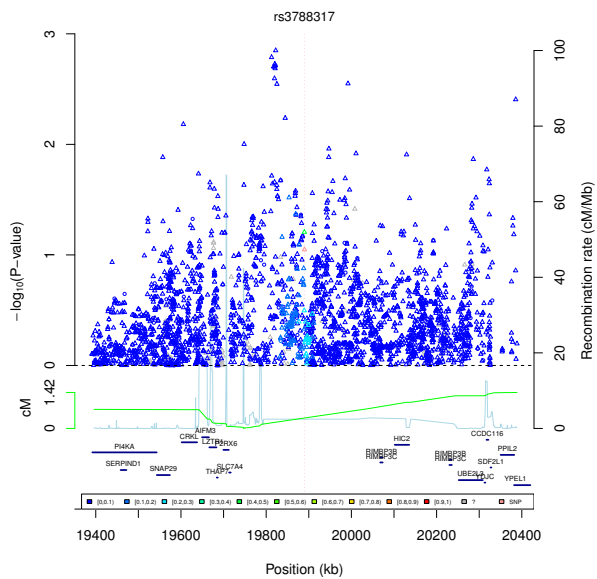

(iv) Hisp P, ASN LD

(n) rs3213787 (Japanese, not replicated [2])

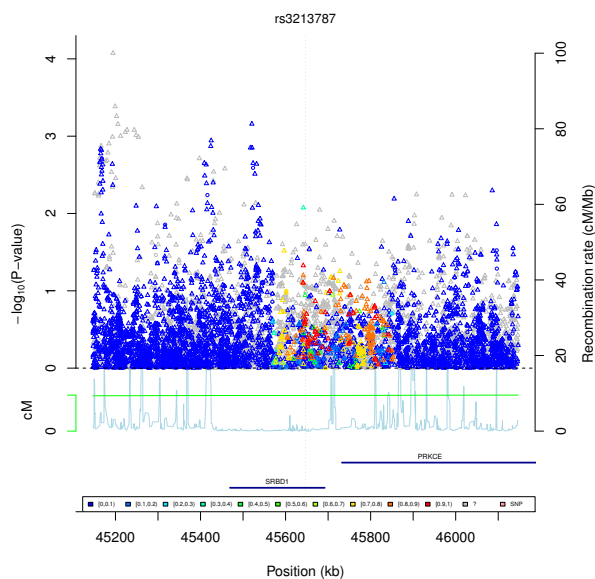

(i) AA I, ASN LD

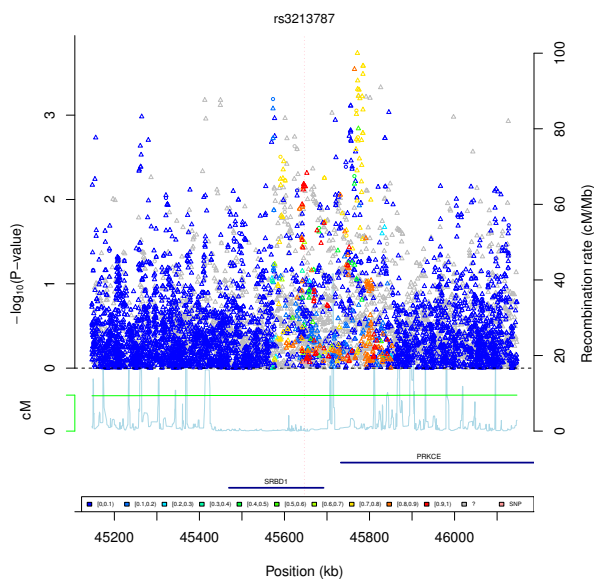

(ii) AA P, ASN LD

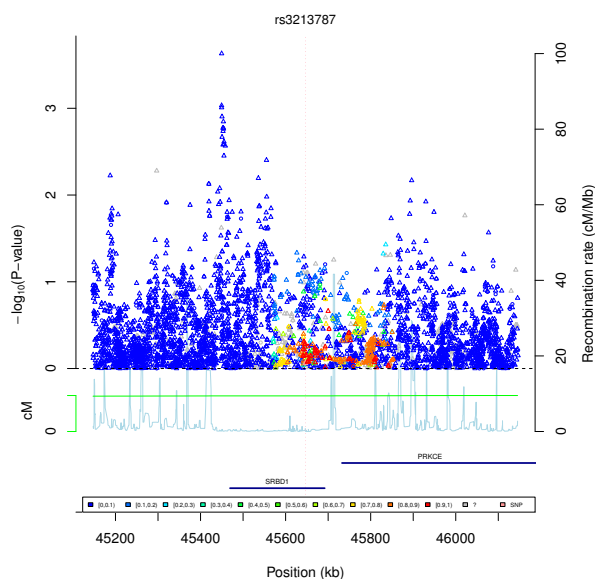

(iii) Hisp I, ASN LD

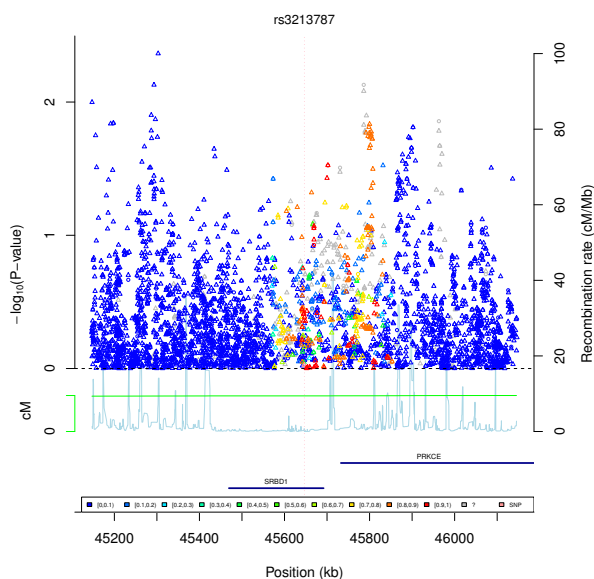

(iv) Hisp P, ASN LD

(o) rs735860 (Japanese, not replicated [2])

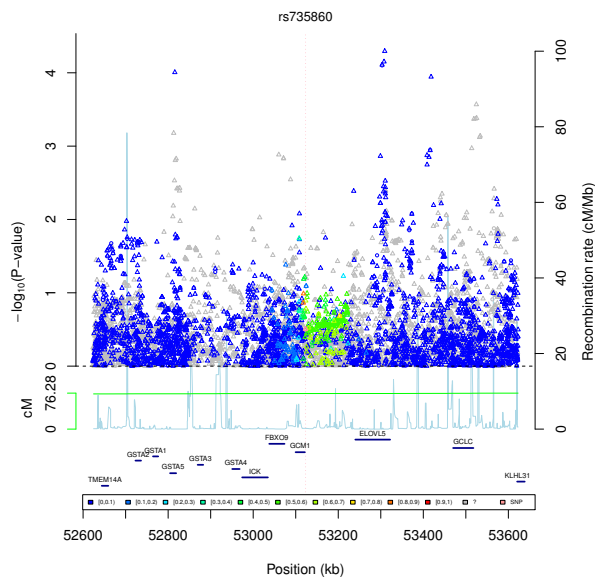

(i) AA I, ASN LD

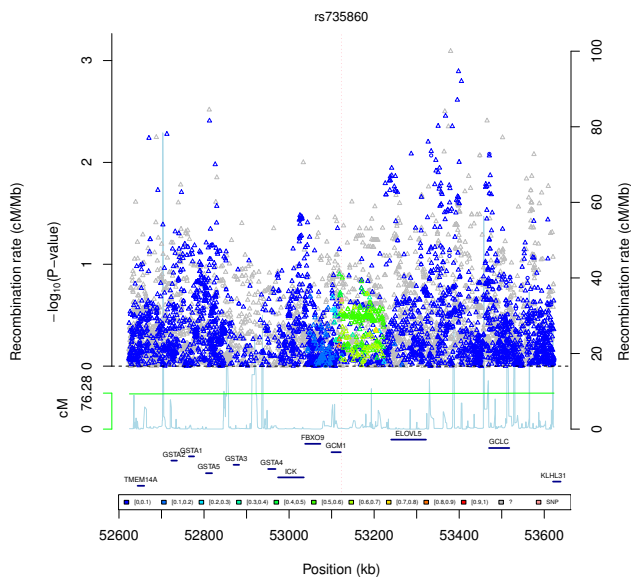

(ii) AA P, ASN LD

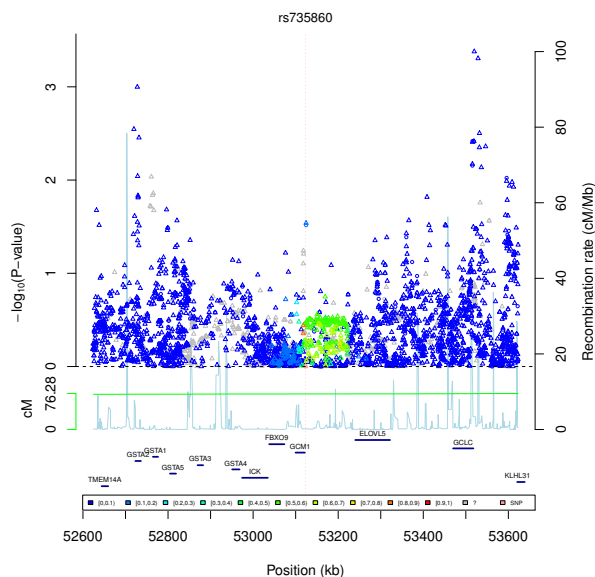

(iii) Hisp I, ASN LD

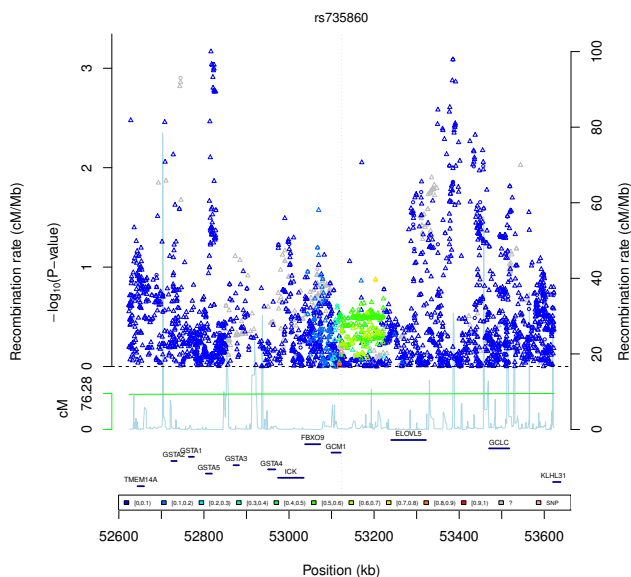

(iv) Hisp P, ASN LD

(p) rs284489 (Meta-analysis of White race/ethnicity [9])

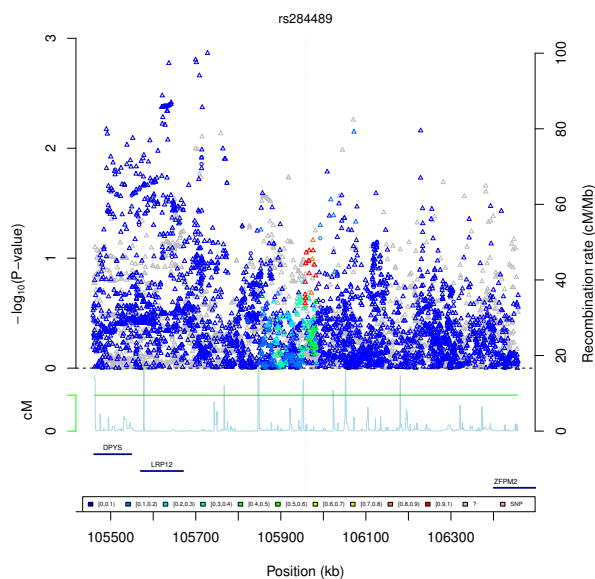

(i) AA I, EUR LD

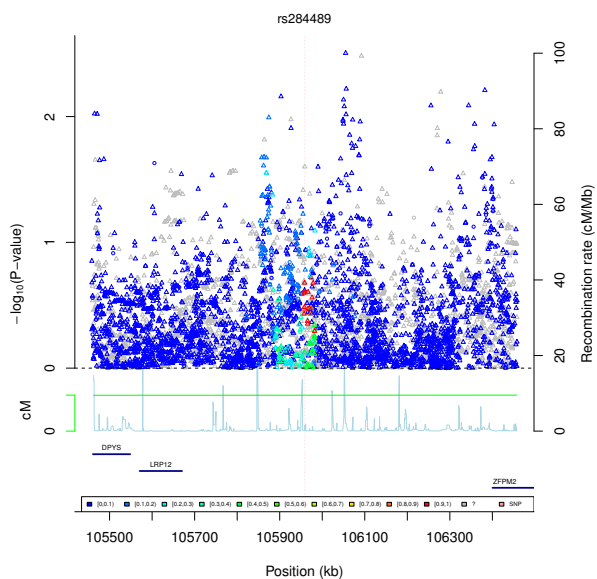

(ii) AA P, EUR LD

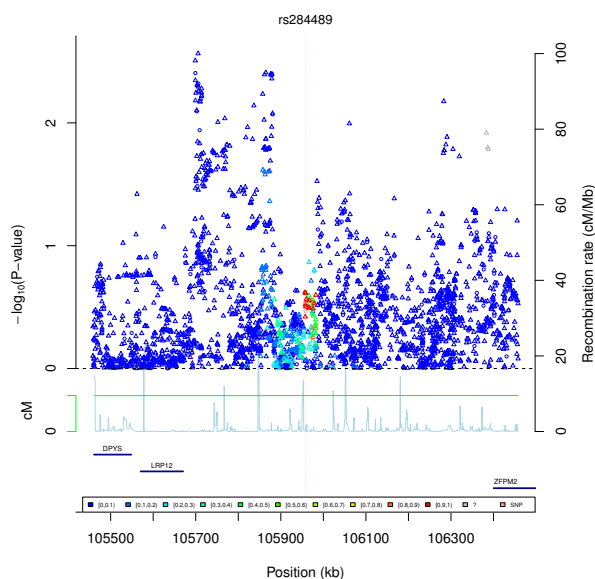

(iii) Hisp I, EUR LD

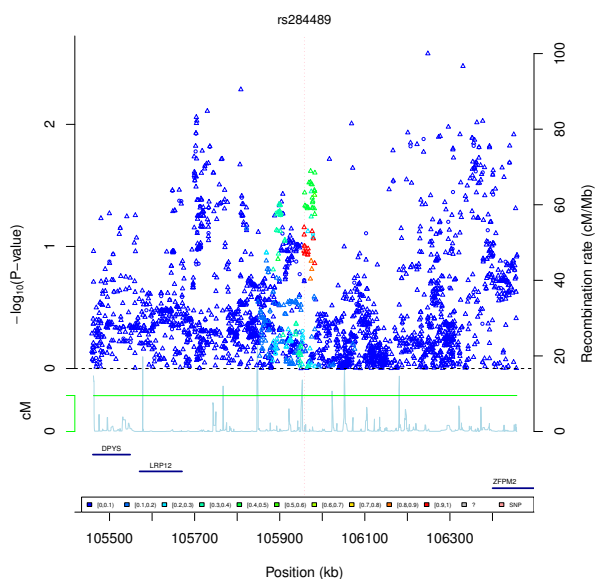

(iv) Hisp P, EUR LD

(q) rs2157719 (Meta-analysis of White ancestry [9])

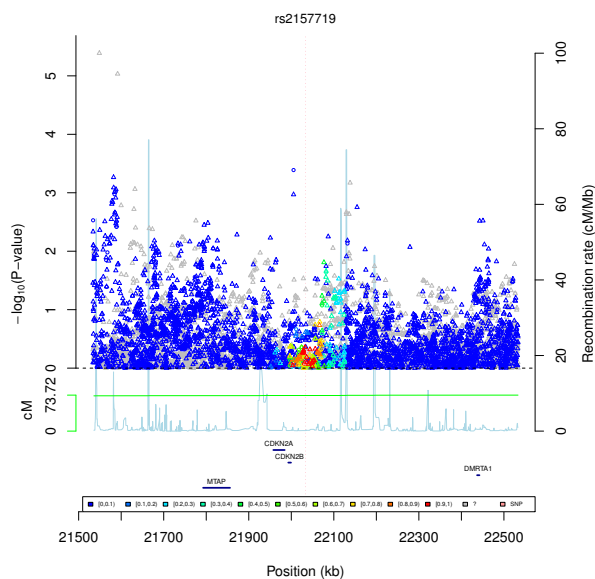

(i) AA I, EUR LD

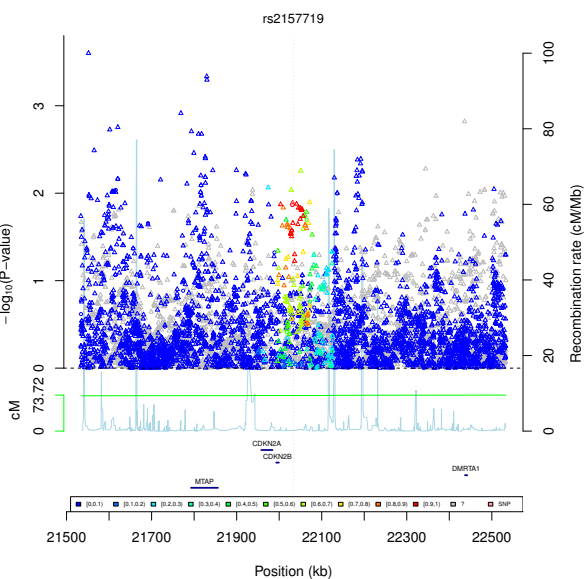

(ii) AA P, EUR LD

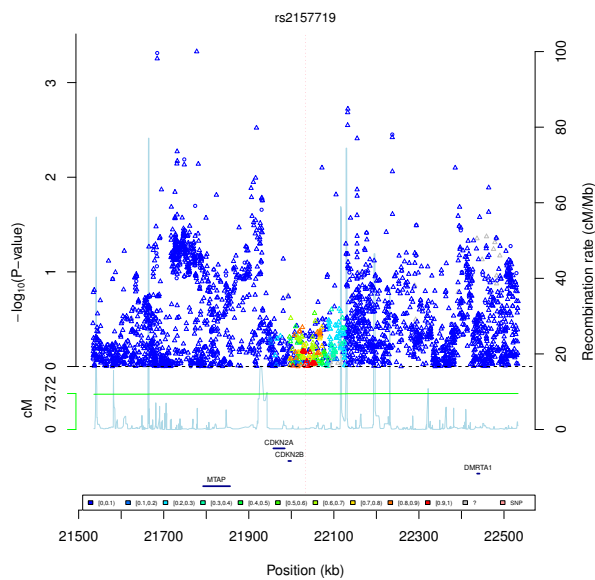

(iii) Hisp I, EUR LD

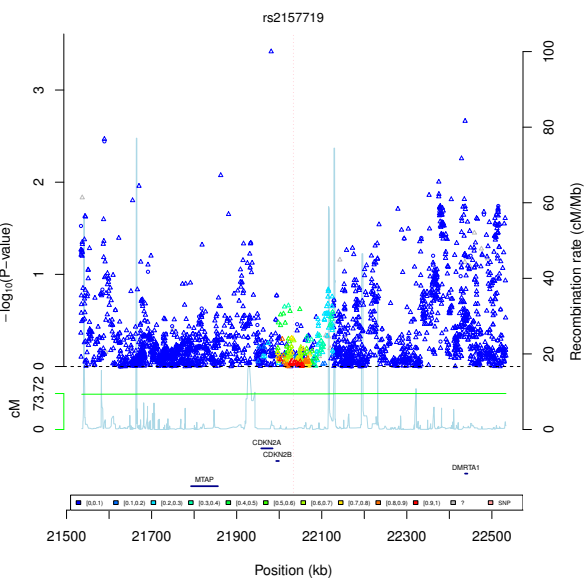

(iv) Hisp P, EUR LD

(r) rs3825942 (Glaucoma (Exfoliation) [6])

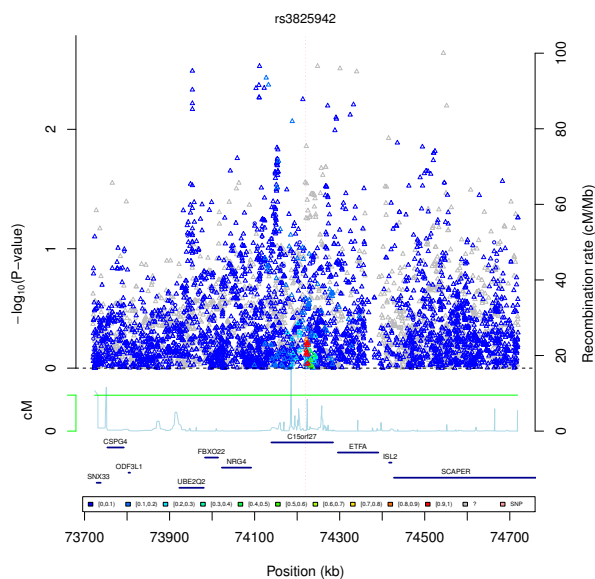

(i) AA I, EUR LD

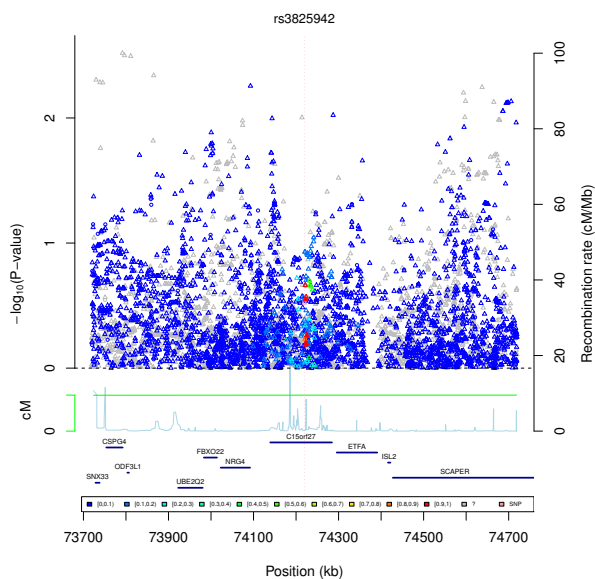

(ii) AA P, EUR LD

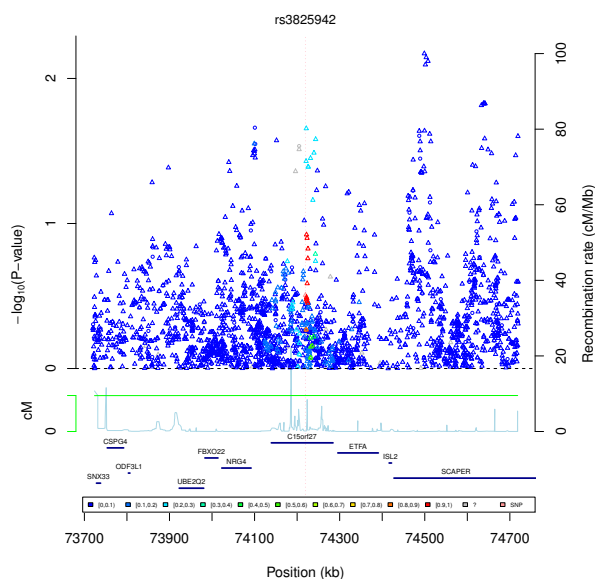

(iii) Hisp I, EUR LD

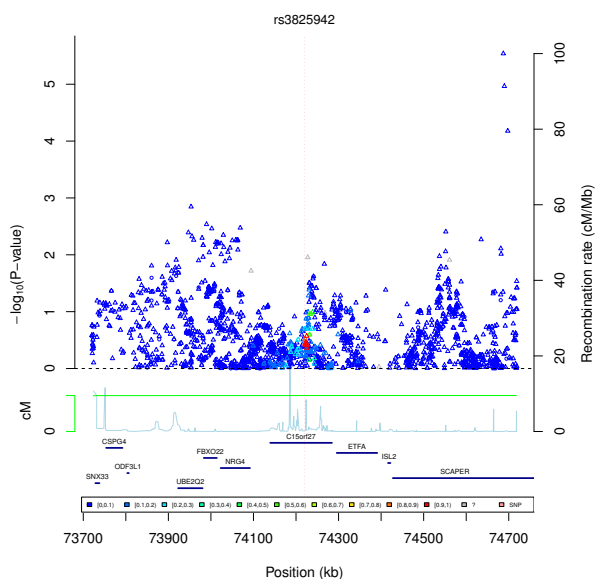

(iv) Hisp P, EUR LD

**Figure S3:** African American local ancestry plots. Pink lines indicate where a previous GWAS found an association with  $p < 5 \times 10^{-8}$ , whereas light green lines indicate where a previous GWAS found an association with  $p > 5 \times 10^{-8}$ . None of the points reach genome-wide significance of  $7 \times 10^{-6}$ .

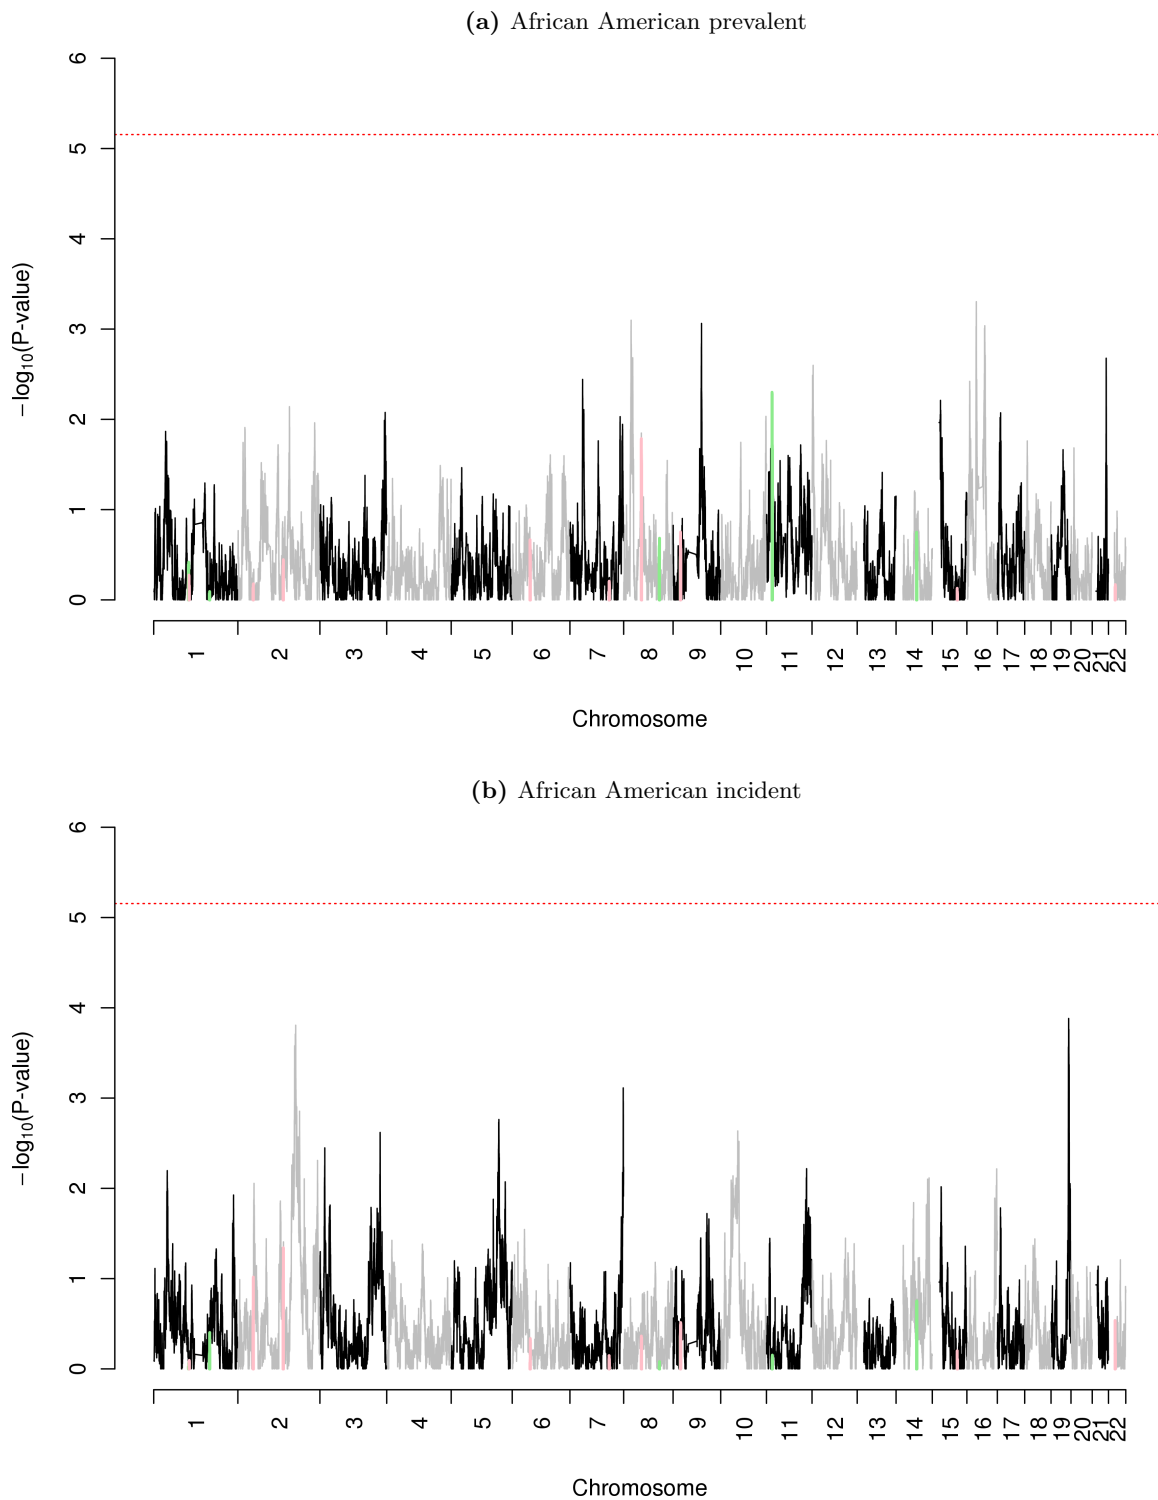

## References

- [1] K. P. Burdon, S. Macgregor, A. W. Hewitt, S. Sharma, G. Chidlow, R. A. Mills, P. Danoy, R. Casson, A. C. Viswanathan, J. Z. Liu, J. Landers, A. K. Henders, J. Wood, E. Souzeau, A. Crawford, P. Leo, J. J. Wang, E. Rohtchina, D. R. Nyholt, N. G. Martin, G. W. Montgomery, P. Mitchell, M. A. Brown, D. A. Mackey, and J. E. Craig. Genome-wide association study identifies susceptibility loci for open angle glaucoma at TMCO1 and CDKN2B-AS1. *Nature Genetics*, 43(6):574–578, 2011.
- [2] A. Meguro, H. Inoko, M. Ota, N. Mizuki, and S. Bahram. Genome-wide association study of normal tension glaucoma: common variants in SRBD1 and ELOVL5 contribute to disease susceptibility. *Ophthalmology*, 117(7):1331–1338.e5, July 2010. PMID: 20363506.
- [3] M. Nakano, Y. Ikeda, Y. Tokuda, M. Fuwa, N. Omi, M. Ueno, K. Imai, H. Adachi, M. Kageyama, K. Mori, S. Kinoshita, and K. Tashiro. Common variants in CDKN2B-AS1 associated with optic-nerve vulnerability of glaucoma identified by genome-wide association studies in japanese. *PLoS ONE*, 7(3):e33389, Mar. 2012.
- [4] W. Osman, S.-K. Low, A. Takahashi, M. Kubo, and Y. Nakamura. A genome-wide association study in the japanese population confirms 9p21 and 14q23 as susceptibility loci for primary open angle glaucoma. *Human Molecular Genetics*, 21(12):2836–2842, June 2012.
- [5] M. Takamoto, T. Kaburaki, A. Mabuchi, M. Araie, S. Amano, M. Aihara, A. Tomidokoro, A. Iwase, F. Mabuchi, K. Kashiwagi, S. Shirato, N. Yasuda, H. Kawashima, F. Nakajima, J. Numaga, Y. Kawamura, T. Sasaki, and K. Tokunaga. Common variants on chromosome 9p21 are associated with normal tension glaucoma. *PLoS ONE*, 7(7):e40107, July 2012.
- [6] G. Thorleifsson, K. P. Magnusson, P. Sulem, G. B. Walters, D. F. Gudbjartsson, H. Stefansson, T. Jonsson, A. Jonasdottir, A. Jonasdottir, G. Stefansdottir, G. Masson, G. A. Hardarson, H. Petursson, A. Arnarsson, M. Motallebipour, O. Wallerman, C. Wadelius, J. R. Gulcher, U. Thorsteinsdottir, A. Kong, F. Jonasson, and K. Stefansson. Common sequence variants in the LOXL1 gene confer susceptibility to exfoliation glaucoma. *Science*, 317(5843):1397–1400, Sept. 2007.
- [7] G. Thorleifsson, G. B. Walters, A. W. Hewitt, G. Masson, A. Helgason, A. DeWan, A. Sigurdsson, A. Jonasdottir, S. A. Gudjonsson, K. P. Magnusson, H. Stefansson, D. S. C. Lam, P. O. S. Tam, G. J. Gudmundsdottir, L. Southgate, K. P. Burdon, M. S. Gottfredsdottir, M. A. Aldred, P. Mitchell, D. S. Clair, D. A. Collier, N. Tang, O. Sveinsson, S. Macgregor, N. G. Martin, A. J. Cree, J. Gibson, A. MacLeod, A. Jacob, S. Ennis, T. L. Young, J. C. N. Chan, W. S. S. Karwatowski, C. J. Hammond, K. Thordarson, M. Zhang, C. Wadelius, A. J. Lotery, R. C. Trembath, C. P. Pang, J. Hoh, J. E. Craig, A. Kong, D. A. Mackey, F. Jonasson, U. Thorsteinsdottir, and K. Stefansson. Common variants near CAV1 and CAV2 are associated with primary open-angle glaucoma. *Nature Genetics*, 42(10):906–909, 2010.
- [8] E. N. Vithana, C.-C. Khor, C. Qiao, M. E. Nongpiur, R. George, L.-J. Chen, T. Do, K. Abu-Amero, C. K. Huang, S. Low, L.-S. A. Tajudin, S. A. Perera, C.-Y. Cheng, L. Xu, H. Jia, C.-L. Ho, K. S. Sim, R.-Y. Wu, C. C. Y. Tham, P. T. K. Chew, D. H. Su, F. T. Oen, S. Sarangapani, N. Soumittra, E. A. Osman, H.-T. Wong, G. Tang, S. Fan, H. Meng, D. T. L. Huong, H. Wang, B. Feng, M. Baskaran, B. Shantha, V. L. Ramprasad, G. Kumaramanickavel, S. K. Iyengar, A. C. How, K. Y. Lee, T. A. Sivakumaran, V. H. K. Yong, S. M. L. Ting, Y. Li, Y.-X. Wang, W.-T. Tay, X. Sim, R. Lavanya, B. K. Cornes, Y.-F. Zheng, T. T. Wong, S.-C. Loon, V. K. Y. Yong, N. Waseem, A. Yaakub, K.-S. Chia, R. R. Allingham, M. A. Hauser, D. S. C. Lam, M. L. Hibberd, S. S. Bhattacharya, M. Zhang, Y. Y. Teo, D. T. Tan, J. B. Jonas, E.-S. Tai, S.-M. Saw, D. N. Hon, S. A. Al-Obeidan, J. Liu, T. N. B. Chau, C. P. Simmons, J.-X. Bei, Y.-X. Zeng, P. J. Foster, L. Vijaya, T.-Y. Wong, C.-P. Pang, N. Wang, and T. Aung. Genome-wide association analyses identify three new susceptibility loci for primary angle closure glaucoma. *Nature Genetics*, 44(10):1142–1146, 2012.
- [9] J. L. Wiggs, B. L. Yaspan, M. A. Hauser, J. H. Kang, R. R. Allingham, L. M. Olson, W. Abdrabou, B. J. Fan, D. Y. Wang, W. Brodeur, D. L. Budenz, J. Caprioli, A. Crenshaw, K. Crooks, E. DelBono, K. F. Doheny, D. S. Friedman, D. Gaasterland, T. Gaasterland, C. Laurie, R. K. Lee, P. R. Lichter, S. Loomis,



Y. Liu, F. A. Medeiros, C. McCarty, D. Mirel, S. E. Moroi, D. C. Musch, A. Realini, F. W. Rozsa, J. S. Schuman, K. Scott, K. Singh, J. D. Stein, E. H. Trager, P. VanVeldhuisen, D. Vollrath, G. Wollstein, S. Yoneyama, K. Zhang, R. N. Weinreb, J. Ernst, M. Kellis, T. Masuda, D. Zack, J. E. Richards, M. Pericak-Vance, L. R. Pasquale, and J. L. Haines. Common variants at 9p21 and 8q22 are associated with increased susceptibility to optic nerve degeneration in glaucoma. *PLoS Genet*, 8(4):e1002654, Apr. 2012.
